# Supplementary material for: Temporal trends and future projections of hip/knee osteoarthritis burden attributable to metabolic risk in women of reproductive age (1990–2021): A multidimensional analysis across 204 countries and territories
Source: Research Square preprint supplement (doi:10.21203/rs.3.rs-6740462/v1), 2025-06-26
Supplement: Supplementary file 1 [file 876168efaab9ecb96f955355.xlsx]

## Sheet: knee
DALYs							YLDs
	Number of DALYs cases (95% UI) in 1990	The age-standardized DALYs rate/100000 (95% UI) in 1990	Number of DALYs cases (95% UI) in 2021	The age-standardized DALYs rate/100000 (95% UI) in 2021	EAPC (95% CI)		Number of YLDs cases (95% UI) in 1990	The age-standardized YLDs rate/100000 (95% UI) in 1990	Number of YLDs cases (95% UI) in 2021	The age-standardized YLDs rate/100000 (95% UI) in 2021	EAPC (95% CI)
Global	118483.85 (-10258.01-327305.17)	10.95 (-0.95-30.22)	342005.11 (-32718.94-915646.95)	16.54 (-1.58-44.3)	1.57 (1.46-1.69)		118483.85 (-10258.01-327305.17)	10.95 (-0.95-30.22)	342005.11 (-32718.94-915646.95)	16.54 (-1.58-44.3)	1.57 (1.46-1.69)
Sex
Female	118483.85 (-10258.01-327305.17)	10.95 (-0.95-30.22)	342005.11 (-32718.94-915646.95)	16.54 (-1.58-44.3)	1.57 (1.46-1.69)		118483.85 (-10258.01-327305.17)	10.95 (-0.95-30.22)	342005.11 (-32718.94-915646.95)	16.54 (-1.58-44.3)	1.57 (1.46-1.69)
Age
30-34 years	1548.9 (-128.21-4421.72)	0.81 (-0.07-2.33)	3820 (-341.42-11075.33)	1.28 (-0.11-3.7)	1.69 (1.58-1.8)		1548.9 (-128.21-4421.72)	0.81 (-0.07-2.33)	3820 (-341.42-11075.33)	1.28 (-0.11-3.7)	1.69 (1.58-1.8)
35-39 years	14511.18 (-1181.95-41141.56)	8.37 (-0.68-23.72)	35850.5 (-3175.14-101260.78)	12.91 (-1.14-36.45)	1.64 (1.5-1.77)		14511.18 (-1181.95-41141.56)	8.37 (-0.68-23.72)	35850.5 (-3175.14-101260.78)	12.91 (-1.14-36.45)	1.64 (1.5-1.77)
40-44 years	36978.04 (-3123.71-104408.63)	26.37 (-2.23-74.46)	98806.46 (-9209.57-269390.15)	39.83 (-3.71-108.59)	1.63 (1.49-1.78)		36978.04 (-3123.71-104408.63)	26.37 (-2.23-74.46)	98806.46 (-9209.57-269390.15)	39.83 (-3.71-108.59)	1.63 (1.49-1.78)
45-49 years	65445.73 (-5824.14-177333.26)	57.51 (-5.12-155.83)	203528.15 (-19992.81-533920.69)	86.37 (-8.48-226.58)	1.53 (1.43-1.63)		65445.73 (-5824.14-177333.26)	57.51 (-5.12-155.83)	203528.15 (-19992.81-533920.69)	86.37 (-8.48-226.58)	1.53 (1.43-1.63)
SDI region
High-middle SDI	27020.96 (-2380.16-75406)	11.46 (-1.01-31.93)	75349.67 (-7166.87-197224.51)	18.62 (-1.76-48.85)	1.84 (1.71-1.97)		27020.96 (-2380.16-75406)	11.46 (-1.01-31.93)	75349.67 (-7166.87-197224.51)	18.62 (-1.76-48.85)	1.84 (1.71-1.97)
High SDI	32718.44 (-2910.5-90162.49)	13.85 (-1.23-38.15)	57645.88 (-5852.68-151777.77)	18.74 (-1.9-49.42)	1.16 (1.1-1.23)		32718.44 (-2910.5-90162.49)	13.85 (-1.23-38.15)	57645.88 (-5852.68-151777.77)	18.74 (-1.9-49.42)	1.16 (1.1-1.23)
Low-middle SDI	16450.19 (-1416-45761.99)	8.07 (-0.7-22.43)	61732.84 (-5845.93-169528.03)	13.55 (-1.29-37.18)	1.89 (1.79-1.99)		16450.19 (-1416-45761.99)	8.07 (-0.7-22.43)	61732.84 (-5845.93-169528.03)	13.55 (-1.29-37.18)	1.89 (1.79-1.99)
Low SDI	5135.15 (-404.38-14403.54)	6.55 (-0.52-18.32)	19478.68 (-1649.38-54852.69)	9.76 (-0.83-27.43)	1.42 (1.35-1.48)		5135.15 (-404.38-14403.54)	6.55 (-0.52-18.32)	19478.68 (-1649.38-54852.69)	9.76 (-0.83-27.43)	1.42 (1.35-1.48)
Middle SDI	37034.95 (-3164.64-102364.94)	11.37 (-0.97-31.34)	127536.77 (-12200.35-344389.03)	18.21 (-1.74-49.21)	1.8 (1.65-1.94)		37034.95 (-3164.64-102364.94)	11.37 (-0.97-31.34)	127536.77 (-12200.35-344389.03)	18.21 (-1.74-49.21)	1.8 (1.65-1.94)
GBD region
Advanced Health System	44708.13 (-4021.63-122572.2)	13.07 (-1.18-35.83)	76971.11 (-7978.11-201458.43)	17.32 (-1.79-45.43)	1.03 (0.99-1.08)		44708.13 (-4021.63-122572.2)	13.07 (-1.18-35.83)	76971.11 (-7978.11-201458.43)	17.32 (-1.79-45.43)	1.03 (0.99-1.08)
Africa	9195.29 (-849.9-25057.82)	9.48 (-0.88-25.79)	34081.15 (-3539-89319.53)	13.08 (-1.36-34.21)	1.03 (1-1.06)		9195.29 (-849.9-25057.82)	9.48 (-0.88-25.79)	34081.15 (-3539-89319.53)	13.08 (-1.36-34.21)	1.03 (1-1.06)
African Region	6222.06 (-531.97-17160.65)	8.24 (-0.7-22.67)	24367.73 (-2336.37-65387.33)	11.64 (-1.12-31.16)	1.11 (1.08-1.15)		6222.06 (-531.97-17160.65)	8.24 (-0.7-22.67)	24367.73 (-2336.37-65387.33)	11.64 (-1.12-31.16)	1.11 (1.08-1.15)
America	26826.67 (-2549.89-72120.47)	16.73 (-1.6-44.91)	59047.82 (-6410.16-150113.81)	20.81 (-2.26-52.95)	0.87 (0.81-0.94)		26826.67 (-2549.89-72120.47)	16.73 (-1.6-44.91)	59047.82 (-6410.16-150113.81)	20.81 (-2.26-52.95)	0.87 (0.81-0.94)
Andean Latin America	1146.51 (-117.06-3045.26)	16.74 (-1.72-44.32)	3916.28 (-417.79-9964.92)	22.95 (-2.45-58.38)	1.15 (1.1-1.2)		1146.51 (-117.06-3045.26)	16.74 (-1.72-44.32)	3916.28 (-417.79-9964.92)	22.95 (-2.45-58.38)	1.15 (1.1-1.2)
Asia	59399.16 (-4805.12-167295.06)	9.57 (-0.77-26.91)	210656.63 (-18835.9-578564.71)	16.62 (-1.48-45.71)	2.13 (1.95-2.31)		59399.16 (-4805.12-167295.06)	9.57 (-0.77-26.91)	210656.63 (-18835.9-578564.71)	16.62 (-1.48-45.71)	2.13 (1.95-2.31)
Australasia	871.53 (-80.46-2380.48)	16.1 (-1.49-43.84)	1882.58 (-210.08-4891.7)	21.83 (-2.42-56.79)	0.98 (0.93-1.03)		871.53 (-80.46-2380.48)	16.1 (-1.49-43.84)	1882.58 (-210.08-4891.7)	21.83 (-2.42-56.79)	0.98 (0.93-1.03)
Basic Health System	52137.75 (-4611.62-146000.82)	11.64 (-1.03-32.53)	176825.19 (-17079.2-469678.12)	19.26 (-1.86-51.22)	1.91 (1.77-2.05)		52137.75 (-4611.62-146000.82)	11.64 (-1.03-32.53)	176825.19 (-17079.2-469678.12)	19.26 (-1.86-51.22)	1.91 (1.77-2.05)
Caribbean	1107.25 (-97.37-2978.35)	15.02 (-1.32-40.37)	2438.22 (-262.57-6314.22)	19.42 (-2.09-50.37)	0.91 (0.87-0.95)		1107.25 (-97.37-2978.35)	15.02 (-1.32-40.37)	2438.22 (-262.57-6314.22)	19.42 (-2.09-50.37)	0.91 (0.87-0.95)
Central Africa	670.99 (-49.33-1868.92)	6.62 (-0.49-18.43)	2891.16 (-242.41-7811.79)	10.34 (-0.87-27.88)	1.4 (1.36-1.45)		670.99 (-49.33-1868.92)	6.62 (-0.49-18.43)	2891.16 (-242.41-7811.79)	10.34 (-0.87-27.88)	1.4 (1.36-1.45)
Central Asia	1026.77 (-93.21-2820.6)	9.21 (-0.84-25.22)	2793.92 (-290.77-7317.47)	11.25 (-1.17-29.44)	0.67 (0.65-0.69)		1026.77 (-93.21-2820.6)	9.21 (-0.84-25.22)	2793.92 (-290.77-7317.47)	11.25 (-1.17-29.44)	0.67 (0.65-0.69)
Central Europe	3133.56 (-275.57-8545.22)	9.74 (-0.86-26.51)	4509.95 (-435.66-11924.63)	12.34 (-1.18-32.74)	0.81 (0.79-0.84)		3133.56 (-275.57-8545.22)	9.74 (-0.86-26.51)	4509.95 (-435.66-11924.63)	12.34 (-1.18-32.74)	0.81 (0.79-0.84)
Central Latin America	4625.24 (-463.37-12322.83)	15.92 (-1.6-42.34)	14348.38 (-1567.95-36784.06)	20.31 (-2.22-52.09)	0.78 (0.76-0.79)		4625.24 (-463.37-12322.83)	15.92 (-1.6-42.34)	14348.38 (-1567.95-36784.06)	20.31 (-2.22-52.09)	0.78 (0.76-0.79)
Central Sub-Saharan Africa	451.09 (-30.76-1308.48)	5.39 (-0.37-15.63)	2261.29 (-171.31-6373.6)	9.55 (-0.72-26.88)	1.83 (1.77-1.9)		451.09 (-30.76-1308.48)	5.39 (-0.37-15.63)	2261.29 (-171.31-6373.6)	9.55 (-0.72-26.88)	1.83 (1.77-1.9)
Commonwealth High Income	3907.54 (-347.82-10568.68)	12.96 (-1.15-35.02)	7056.21 (-738.43-18352.29)	17.25 (-1.8-44.92)	0.94 (0.89-0.99)		3907.54 (-347.82-10568.68)	12.96 (-1.15-35.02)	7056.21 (-738.43-18352.29)	17.25 (-1.8-44.92)	0.94 (0.89-0.99)
Commonwealth Low Income	1849.73 (-140.24-5387.07)	6.22 (-0.47-18.09)	10431.06 (-884.65-28774.78)	12.67 (-1.07-34.87)	2.66 (2.55-2.77)		1849.73 (-140.24-5387.07)	6.22 (-0.47-18.09)	10431.06 (-884.65-28774.78)	12.67 (-1.07-34.87)	2.66 (2.55-2.77)
Commonwealth Middle Income	16341.18 (-1322.79-46278.08)	7.73 (-0.63-21.87)	64471.03 (-5644.74-181797.59)	13.04 (-1.15-36.73)	1.97 (1.81-2.13)		16341.18 (-1322.79-46278.08)	7.73 (-0.63-21.87)	64471.03 (-5644.74-181797.59)	13.04 (-1.15-36.73)	1.97 (1.81-2.13)
East Asia	29546.41 (-2448.78-84581.87)	11.83 (-0.98-33.75)	101812.95 (-9186.96-275436.9)	22.43 (-2.01-60.82)	2.47 (2.27-2.66)		29546.41 (-2448.78-84581.87)	11.83 (-0.98-33.75)	101812.95 (-9186.96-275436.9)	22.43 (-2.01-60.82)	2.47 (2.27-2.66)
East Asia & Pacific - WB	41862.08 (-3454.57-120246.73)	10.7 (-0.88-30.68)	135626.1 (-12155.56-369365.23)	18.97 (-1.7-51.75)	2.2 (2.02-2.37)		41862.08 (-3454.57-120246.73)	10.7 (-0.88-30.68)	135626.1 (-12155.56-369365.23)	18.97 (-1.7-51.75)	2.2 (2.02-2.37)
Eastern Africa	1771.61 (-143.49-4927.61)	7.02 (-0.57-19.47)	6885.56 (-618.38-18718.9)	9.95 (-0.89-27.01)	1.17 (1.14-1.2)		1771.61 (-143.49-4927.61)	7.02 (-0.57-19.47)	6885.56 (-618.38-18718.9)	9.95 (-0.89-27.01)	1.17 (1.14-1.2)
Eastern Europe	5541.27 (-509.1-15054.38)	10.26 (-0.95-27.78)	8474.5 (-922.67-21811.14)	12.78 (-1.39-32.93)	0.75 (0.73-0.76)		5541.27 (-509.1-15054.38)	10.26 (-0.95-27.78)	8474.5 (-922.67-21811.14)	12.78 (-1.39-32.93)	0.75 (0.73-0.76)
Eastern Mediterranean Region	6920.7 (-671.4-18795.28)	11.51 (-1.12-31.2)	29383.48 (-3249.99-75285.68)	16.85 (-1.87-43.1)	1.32 (1.29-1.34)		6920.7 (-671.4-18795.28)	11.51 (-1.12-31.2)	29383.48 (-3249.99-75285.68)	16.85 (-1.87-43.1)	1.32 (1.29-1.34)
Eastern Sub-Saharan Africa	1708.06 (-131.85-4836.47)	6.22 (-0.48-17.56)	6625.27 (-561.35-18274.15)	8.99 (-0.76-24.71)	1.24 (1.21-1.27)		1708.06 (-131.85-4836.47)	6.22 (-0.48-17.56)	6625.27 (-561.35-18274.15)	8.99 (-0.76-24.71)	1.24 (1.21-1.27)
Europe	22730.89 (-2053.17-62077.69)	11.32 (-1.02-30.88)	37696.23 (-3876.59-98407.91)	14.84 (-1.52-38.84)	0.92 (0.89-0.94)		22730.89 (-2053.17-62077.69)	11.32 (-1.02-30.88)	37696.23 (-3876.59-98407.91)	14.84 (-1.52-38.84)	0.92 (0.89-0.94)
Europe & Central Asia - WB	23375.14 (-2111.11-63900.46)	11.23 (-1.02-30.68)	39725.15 (-4082.18-103647.71)	14.58 (-1.49-38.13)	0.88 (0.86-0.9)		23375.14 (-2111.11-63900.46)	11.23 (-1.02-30.68)	39725.15 (-4082.18-103647.71)	14.58 (-1.49-38.13)	0.88 (0.86-0.9)
European Region	23581.03 (-2130.69-64444.34)	11.24 (-1.02-30.7)	40235.98 (-4129.24-105057.17)	14.59 (-1.49-38.19)	0.88 (0.86-0.9)		23581.03 (-2130.69-64444.34)	11.24 (-1.02-30.7)	40235.98 (-4129.24-105057.17)	14.59 (-1.49-38.19)	0.88 (0.86-0.9)
High-income Asia Pacific	5483.5 (-452.22-15758.7)	10.52 (-0.87-30.23)	7901.56 (-679-22278.46)	13.62 (-1.16-38.61)	0.88 (0.84-0.92)		5483.5 (-452.22-15758.7)	10.52 (-0.87-30.23)	7901.56 (-679-22278.46)	13.62 (-1.16-38.61)	0.88 (0.84-0.92)
High-income North America	14177.2 (-1334.61-38110.11)	18.66 (-1.76-50.1)	22459.38 (-2537.04-57297.78)	23.08 (-2.6-58.96)	1.07 (0.9-1.23)		14177.2 (-1334.61-38110.11)	18.66 (-1.76-50.1)	22459.38 (-2537.04-57297.78)	23.08 (-2.6-58.96)	1.07 (0.9-1.23)
Latin America & Caribbean - WB	12844.68 (-1235.27-34164.73)	15.06 (-1.46-39.97)	36825.9 (-3905.1-93989.17)	19.66 (-2.08-50.2)	0.88 (0.87-0.89)		12844.68 (-1235.27-34164.73)	15.06 (-1.46-39.97)	36825.9 (-3905.1-93989.17)	19.66 (-2.08-50.2)	0.88 (0.87-0.89)
Limited Health System	20042.46 (-1629.82-56728.91)	7.46 (-0.61-21.1)	82607.95 (-7206.45-232108.96)	12.68 (-1.11-35.59)	1.99 (1.85-2.12)		20042.46 (-1629.82-56728.91)	7.46 (-0.61-21.1)	82607.95 (-7206.45-232108.96)	12.68 (-1.11-35.59)	1.99 (1.85-2.12)
Middle East & North Africa - WB	5374.1 (-540.52-14389.32)	13.34 (-1.35-35.6)	22729.68 (-2701.68-58139.82)	18.64 (-2.22-47.62)	1.09 (1.08-1.11)		5374.1 (-540.52-14389.32)	13.34 (-1.35-35.6)	22729.68 (-2701.68-58139.82)	18.64 (-2.22-47.62)	1.09 (1.08-1.11)
Minimal Health System	1471.36 (-112.08-4169.99)	6.86 (-0.52-19.41)	5339.58 (-423.39-14838.96)	9.79 (-0.78-27.19)	1.2 (1.11-1.28)		1471.36 (-112.08-4169.99)	6.86 (-0.52-19.41)	5339.58 (-423.39-14838.96)	9.79 (-0.78-27.19)	1.2 (1.11-1.28)
North Africa and Middle East	7468.58 (-747.98-20023.19)	13.59 (-1.37-36.32)	29771.04 (-3557.28-75361.65)	18.81 (-2.25-47.56)	1.05 (1.03-1.06)		7468.58 (-747.98-20023.19)	13.59 (-1.37-36.32)	29771.04 (-3557.28-75361.65)	18.81 (-2.25-47.56)	1.05 (1.03-1.06)
North America	14178.79 (-1334.79-38114.72)	18.66 (-1.76-50.1)	22461.97 (-2537.33-57303.75)	23.08 (-2.61-58.97)	1.07 (0.9-1.23)		14178.79 (-1334.79-38114.72)	18.66 (-1.76-50.1)	22461.97 (-2537.33-57303.75)	23.08 (-2.61-58.97)	1.07 (0.9-1.23)
Northern Africa	2979.51 (-314.58-7963.9)	14.29 (-1.52-38.1)	10100.84 (-1278.16-25806.48)	19.64 (-2.49-50.13)	1.03 (1.01-1.06)		2979.51 (-314.58-7963.9)	14.29 (-1.52-38.1)	10100.84 (-1278.16-25806.48)	19.64 (-2.49-50.13)	1.03 (1.01-1.06)
Oceania	184.36 (-17.57-505.61)	16.72 (-1.59-45.75)	620.75 (-63.64-1707.03)	20.55 (-2.12-56.44)	0.56 (0.48-0.65)		184.36 (-17.57-505.61)	16.72 (-1.59-45.75)	620.75 (-63.64-1707.03)	20.55 (-2.12-56.44)	0.56 (0.48-0.65)
Region of the Americas	26826.67 (-2549.89-72120.47)	16.73 (-1.6-44.91)	59047.82 (-6410.16-150113.81)	20.81 (-2.26-52.95)	0.87 (0.81-0.94)		26826.67 (-2549.89-72120.47)	16.73 (-1.6-44.91)	59047.82 (-6410.16-150113.81)	20.81 (-2.26-52.95)	0.87 (0.81-0.94)
South-East Asia Region	17280.81 (-1353.68-50074.62)	7.12 (-0.56-20.63)	69917.43 (-5869.31-198280.28)	12.95 (-1.09-36.72)	2.23 (2.07-2.39)		17280.81 (-1353.68-50074.62)	7.12 (-0.56-20.63)	69917.43 (-5869.31-198280.28)	12.95 (-1.09-36.72)	2.23 (2.07-2.39)
South Asia	13879.38 (-1087.72-39699.08)	7.07 (-0.55-20.21)	58614.37 (-4945.73-168034.51)	12.92 (-1.09-36.99)	2.32 (2.14-2.51)		13879.38 (-1087.72-39699.08)	7.07 (-0.55-20.21)	58614.37 (-4945.73-168034.51)	12.92 (-1.09-36.99)	2.32 (2.14-2.51)
South Asia - WB	14415.43 (-1130.2-41289.05)	7.14 (-0.56-20.42)	60188.35 (-5079-172319.92)	12.92 (-1.09-36.97)	2.29 (2.1-2.47)		14415.43 (-1130.2-41289.05)	7.14 (-0.56-20.42)	60188.35 (-5079-172319.92)	12.92 (-1.09-36.97)	2.29 (2.1-2.47)
Southeast Asia	6134.09 (-492.73-17551.02)	7.06 (-0.57-20.18)	24339.34 (-2122.17-67517.13)	12.32 (-1.07-34.2)	1.89 (1.81-1.96)		6134.09 (-492.73-17551.02)	7.06 (-0.57-20.18)	24339.34 (-2122.17-67517.13)	12.32 (-1.07-34.2)	1.89 (1.81-1.96)
Southern Africa	1520.67 (-138.18-4158.89)	9.78 (-0.89-26.69)	4792.57 (-500.56-12553.62)	13.01 (-1.37-33.99)	0.88 (0.85-0.9)		1520.67 (-138.18-4158.89)	9.78 (-0.89-26.69)	4792.57 (-500.56-12553.62)	13.01 (-1.37-33.99)	0.88 (0.85-0.9)
Southern Latin America	1910.47 (-180.62-5162.52)	16.36 (-1.55-44.21)	4120.47 (-410.71-10517.98)	21.45 (-2.13-54.83)	0.91 (0.86-0.96)		1910.47 (-180.62-5162.52)	16.36 (-1.55-44.21)	4120.47 (-410.71-10517.98)	21.45 (-2.13-54.83)	0.91 (0.86-0.96)
Southern Sub-Saharan Africa	1103.1 (-108.76-2922.85)	12.13 (-1.2-32.02)	2996.37 (-339.73-7532)	15.15 (-1.73-37.96)	0.7 (0.69-0.71)		1103.1 (-108.76-2922.85)	12.13 (-1.2-32.02)	2996.37 (-339.73-7532)	15.15 (-1.73-37.96)	0.7 (0.69-0.71)
Sub-Saharan Africa - WB	6256.64 (-537.07-17241.69)	8.2 (-0.7-22.54)	24095 (-2281.54-64879.41)	11.5 (-1.09-30.9)	1.09 (1.06-1.12)		6256.64 (-537.07-17241.69)	8.2 (-0.7-22.54)	24095 (-2281.54-64879.41)	11.5 (-1.09-30.9)	1.09 (1.06-1.12)
Tropical Latin America	4096.08 (-376.41-11247.18)	13.38 (-1.24-36.66)	12089.93 (-1253.24-31721.83)	17.72 (-1.84-46.48)	0.9 (0.88-0.92)		4096.08 (-376.41-11247.18)	13.38 (-1.24-36.66)	12089.93 (-1253.24-31721.83)	17.72 (-1.84-46.48)	0.9 (0.88-0.92)
Western Africa	2252.51 (-197.72-6212.81)	8.95 (-0.79-24.64)	9411.02 (-887.65-25236.44)	12.53 (-1.19-33.54)	1.07 (0.99-1.15)		2252.51 (-197.72-6212.81)	8.95 (-0.79-24.64)	9411.02 (-887.65-25236.44)	12.53 (-1.19-33.54)	1.07 (0.99-1.15)
Western Europe	12306.41 (-1084.16-34002.11)	12.02 (-1.06-33.21)	19372.25 (-1812.33-51415.09)	15.6 (-1.45-41.53)	0.84 (0.79-0.9)		12306.41 (-1084.16-34002.11)	12.02 (-1.06-33.21)	19372.25 (-1812.33-51415.09)	15.6 (-1.45-41.53)	0.84 (0.79-0.9)
Western Pacific Region	36737.01 (-3047.41-105211.33)	11.27 (-0.94-32.22)	116325.25 (-10424.49-315752.27)	20.14 (-1.8-54.79)	2.26 (2.07-2.45)		36737.01 (-3047.41-105211.33)	11.27 (-0.94-32.22)	116325.25 (-10424.49-315752.27)	20.14 (-1.8-54.79)	2.26 (2.07-2.45)
Western Sub-Saharan Africa	2583 (-227.95-7098.53)	9.22 (-0.82-25.29)	10656.31 (-1012.98-28601.91)	12.72 (-1.21-34.07)	1.01 (0.94-1.09)		2583 (-227.95-7098.53)	9.22 (-0.82-25.29)	10656.31 (-1012.98-28601.91)	12.72 (-1.21-34.07)	1.01 (0.94-1.09)
Country
Afghanistan	206.14 (-15.65-564.9)	10.47 (-0.79-28.79)	692.85 (-55.65-1887.71)	12.73 (-1.03-34.74)	0.73 (0.66-0.8)		206.14 (-15.65-564.9)	10.47 (-0.79-28.79)	692.85 (-55.65-1887.71)	12.73 (-1.03-34.74)	0.73 (0.66-0.8)
Albania	53.59 (-5-149.47)	9.27 (-0.87-25.76)	87.02 (-9.24-229.7)	12.34 (-1.31-32.73)	0.95 (0.93-0.97)		53.59 (-5-149.47)	9.27 (-0.87-25.76)	87.02 (-9.24-229.7)	12.34 (-1.31-32.73)	0.95 (0.93-0.97)
Algeria	458.72 (-41.28-1311.79)	12.56 (-1.13-35.77)	2166.2 (-256.65-5643.56)	18.18 (-2.17-47.32)	1.23 (1.17-1.28)		458.72 (-41.28-1311.79)	12.56 (-1.13-35.77)	2166.2 (-256.65-5643.56)	18.18 (-2.17-47.32)	1.23 (1.17-1.28)
American Samoa	2.47 (-0.31-6.41)	29.97 (-3.82-77.69)	4.69 (-0.68-11.81)	35.36 (-5.14-89.1)	0.44 (0.36-0.52)		2.47 (-0.31-6.41)	29.97 (-3.82-77.69)	4.69 (-0.68-11.81)	35.36 (-5.14-89.1)	0.44 (0.36-0.52)
Andorra	1.81 (-0.17-5.13)	12.62 (-1.17-35.81)	5 (-0.49-13.58)	15.6 (-1.49-42.63)	0.74 (0.71-0.76)		1.81 (-0.17-5.13)	12.62 (-1.17-35.81)	5 (-0.49-13.58)	15.6 (-1.49-42.63)	0.74 (0.71-0.76)
Angola	98.54 (-7.66-280.62)	6.24 (-0.49-17.8)	582.32 (-49.75-1648.15)	10.4 (-0.89-29.34)	1.63 (1.56-1.7)		98.54 (-7.66-280.62)	6.24 (-0.49-17.8)	582.32 (-49.75-1648.15)	10.4 (-0.89-29.34)	1.63 (1.56-1.7)
Antigua and Barbuda	2 (-0.2-5.46)	15.85 (-1.6-43.16)	6.01 (-0.69-15.39)	20.68 (-2.36-53.11)	0.86 (0.84-0.88)		2 (-0.2-5.46)	15.85 (-1.6-43.16)	6.01 (-0.69-15.39)	20.68 (-2.36-53.11)	0.86 (0.84-0.88)
Argentina	1261.96 (-118.83-3461.6)	16.01 (-1.51-43.93)	2725.29 (-257.88-6921.46)	21.06 (-1.99-53.53)	0.95 (0.9-1)		1261.96 (-118.83-3461.6)	16.01 (-1.51-43.93)	2725.29 (-257.88-6921.46)	21.06 (-1.99-53.53)	0.95 (0.9-1)
Armenia	58.59 (-5.83-155.19)	9.51 (-0.95-25.08)	97.17 (-10.06-248.78)	11.42 (-1.18-29.17)	0.6 (0.58-0.62)		58.59 (-5.83-155.19)	9.51 (-0.95-25.08)	97.17 (-10.06-248.78)	11.42 (-1.18-29.17)	0.6 (0.58-0.62)
Australia	744.85 (-69.79-2027.79)	16.42 (-1.55-44.57)	1625.16 (-183.19-4200.88)	22.41 (-2.51-58.01)	1 (0.94-1.06)		744.85 (-69.79-2027.79)	16.42 (-1.55-44.57)	1625.16 (-183.19-4200.88)	22.41 (-2.51-58.01)	1 (0.94-1.06)
Austria	247.48 (-23.33-697.48)	11.39 (-1.07-32.24)	370.38 (-31.4-1055.8)	14.36 (-1.21-41.06)	0.75 (0.72-0.78)		247.48 (-23.33-697.48)	11.39 (-1.07-32.24)	370.38 (-31.4-1055.8)	14.36 (-1.21-41.06)	0.75 (0.72-0.78)
Azerbaijan	112.84 (-10.57-311.1)	9.88 (-0.93-27.06)	357.66 (-40.68-895.96)	12.34 (-1.41-30.86)	0.8 (0.78-0.83)		112.84 (-10.57-311.1)	9.88 (-0.93-27.06)	357.66 (-40.68-895.96)	12.34 (-1.41-30.86)	0.8 (0.78-0.83)
Bahamas	9.71 (-0.85-25.95)	17.86 (-1.57-47.55)	27.34 (-3.17-71.68)	22.51 (-2.6-59.1)	0.75 (0.71-0.78)		9.71 (-0.85-25.95)	17.86 (-1.57-47.55)	27.34 (-3.17-71.68)	22.51 (-2.6-59.1)	0.75 (0.71-0.78)
Bahrain	10.55 (-1.02-28.17)	15.55 (-1.54-41.25)	75.44 (-10.12-188.96)	21.79 (-2.92-54.6)	1.08 (1.06-1.1)		10.55 (-1.02-28.17)	15.55 (-1.54-41.25)	75.44 (-10.12-188.96)	21.79 (-2.92-54.6)	1.08 (1.06-1.1)
Bangladesh	801.8 (-58.17-2513.72)	5.19 (-0.37-16.23)	6031.73 (-509.92-16898.86)	14.07 (-1.19-39.41)	3.86 (3.67-4.04)		801.8 (-58.17-2513.72)	5.19 (-0.37-16.23)	6031.73 (-509.92-16898.86)	14.07 (-1.19-39.41)	3.86 (3.67-4.04)
Barbados	10.68 (-1.25-27.57)	18.52 (-2.18-47.66)	21.01 (-2.2-52.94)	23.05 (-2.41-58.22)	0.65 (0.61-0.7)		10.68 (-1.25-27.57)	18.52 (-2.18-47.66)	21.01 (-2.2-52.94)	23.05 (-2.41-58.22)	0.65 (0.61-0.7)
Belarus	252.25 (-23.44-682.08)	10.48 (-0.98-28.25)	403.56 (-43.45-1066.27)	13.89 (-1.49-36.72)	0.98 (0.96-1)		252.25 (-23.44-682.08)	10.48 (-0.98-28.25)	403.56 (-43.45-1066.27)	13.89 (-1.49-36.72)	0.98 (0.96-1)
Belgium	295.99 (-24.07-813.15)	11.68 (-0.94-32.05)	490.28 (-45.85-1360.48)	15.67 (-1.45-43.65)	0.9 (0.84-0.97)		295.99 (-24.07-813.15)	11.68 (-0.94-32.05)	490.28 (-45.85-1360.48)	15.67 (-1.45-43.65)	0.9 (0.84-0.97)
Belize	4.71 (-0.49-12.38)	18.97 (-1.98-49.69)	25.27 (-3-67.18)	23.86 (-2.84-63.35)	0.71 (0.63-0.78)		4.71 (-0.49-12.38)	18.97 (-1.98-49.69)	25.27 (-3-67.18)	23.86 (-2.84-63.35)	0.71 (0.63-0.78)
Benin	86.62 (-7.06-244)	12.27 (-1-34.5)	325.31 (-30.83-911.86)	14.51 (-1.38-40.5)	0.52 (0.47-0.57)		86.62 (-7.06-244)	12.27 (-1-34.5)	325.31 (-30.83-911.86)	14.51 (-1.38-40.5)	0.52 (0.47-0.57)
Bermuda	3.29 (-0.33-8.96)	18.74 (-1.91-50.97)	4.64 (-0.51-11.98)	23.85 (-2.64-61.69)	0.75 (0.72-0.78)		3.29 (-0.33-8.96)	18.74 (-1.91-50.97)	4.64 (-0.51-11.98)	23.85 (-2.64-61.69)	0.75 (0.72-0.78)
Bhutan	13.71 (-1.18-37.75)	15.55 (-1.33-42.84)	38.64 (-3.79-99.64)	21.14 (-2.08-54.39)	1.1 (1.07-1.13)		13.71 (-1.18-37.75)	15.55 (-1.33-42.84)	38.64 (-3.79-99.64)	21.14 (-2.08-54.39)	1.1 (1.07-1.13)
Bolivia (Plurinational State of)	171.34 (-15.9-462.01)	14.94 (-1.39-40.12)	598.48 (-63.5-1562.28)	20.93 (-2.22-54.64)	1.13 (1.1-1.17)		171.34 (-15.9-462.01)	14.94 (-1.39-40.12)	598.48 (-63.5-1562.28)	20.93 (-2.22-54.64)	1.13 (1.1-1.17)
Bosnia and Herzegovina	101.73 (-10.15-272.78)	9.56 (-0.96-25.58)	125.56 (-12.58-326.04)	12.57 (-1.25-32.73)	0.89 (0.83-0.96)		101.73 (-10.15-272.78)	9.56 (-0.96-25.58)	125.56 (-12.58-326.04)	12.57 (-1.25-32.73)	0.89 (0.83-0.96)
Botswana	21.21 (-1.45-61.2)	10.59 (-0.72-30.39)	92.44 (-8.66-248.25)	14.89 (-1.4-39.85)	1.01 (0.95-1.08)		21.21 (-1.45-61.2)	10.59 (-0.72-30.39)	92.44 (-8.66-248.25)	14.89 (-1.4-39.85)	1.01 (0.95-1.08)
Brazil	3991.24 (-366.99-10972.83)	13.34 (-1.24-36.59)	11762 (-1216.5-30833.34)	17.67 (-1.83-46.32)	0.9 (0.88-0.92)		3991.24 (-366.99-10972.83)	13.34 (-1.24-36.59)	11762 (-1216.5-30833.34)	17.67 (-1.83-46.32)	0.9 (0.88-0.92)
Brunei Darussalam	6.62 (-0.54-19.27)	15.1 (-1.24-43.67)	30.86 (-2.89-84.65)	23.2 (-2.18-63.59)	1.47 (1.32-1.61)		6.62 (-0.54-19.27)	15.1 (-1.24-43.67)	30.86 (-2.89-84.65)	23.2 (-2.18-63.59)	1.47 (1.32-1.61)
Bulgaria	268.43 (-23.97-733.04)	10.93 (-0.98-29.85)	270.32 (-22.46-707.07)	12.66 (-1.05-33.26)	0.48 (0.46-0.5)		268.43 (-23.97-733.04)	10.93 (-0.98-29.85)	270.32 (-22.46-707.07)	12.66 (-1.05-33.26)	0.48 (0.46-0.5)
Burkina Faso	104.26 (-9.05-312.76)	6.91 (-0.6-20.71)	327.1 (-27.3-958.75)	9.02 (-0.76-26.43)	0.84 (0.8-0.89)		104.26 (-9.05-312.76)	6.91 (-0.6-20.71)	327.1 (-27.3-958.75)	9.02 (-0.76-26.43)	0.84 (0.8-0.89)
Burundi	32.21 (-2.43-98.39)	3.97 (-0.3-12.08)	104.62 (-8.09-318)	5.28 (-0.41-16.06)	0.83 (0.75-0.91)		32.21 (-2.43-98.39)	3.97 (-0.3-12.08)	104.62 (-8.09-318)	5.28 (-0.41-16.06)	0.83 (0.75-0.91)
Cabo Verde	4.94 (-0.43-13.91)	10.9 (-0.95-30.63)	20.28 (-2.12-53.96)	15.81 (-1.68-41.86)	1.2 (1.19-1.21)		4.94 (-0.43-13.91)	10.9 (-0.95-30.63)	20.28 (-2.12-53.96)	15.81 (-1.68-41.86)	1.2 (1.19-1.21)
Cambodia	96.03 (-6.79-290.63)	5.49 (-0.39-16.54)	349.96 (-24.89-1063.71)	8.83 (-0.63-26.85)	1.62 (1.57-1.67)		96.03 (-6.79-290.63)	5.49 (-0.39-16.54)	349.96 (-24.89-1063.71)	8.83 (-0.63-26.85)	1.62 (1.57-1.67)
Cameroon	225.07 (-19.18-609.3)	14.16 (-1.21-38.25)	907.41 (-97.67-2456.98)	16.8 (-1.82-45.38)	0.47 (0.44-0.49)		225.07 (-19.18-609.3)	14.16 (-1.21-38.25)	907.41 (-97.67-2456.98)	16.8 (-1.82-45.38)	0.47 (0.44-0.49)
Canada	739.7 (-64.39-1999.69)	9.72 (-0.85-26.24)	1287.62 (-130.65-3350.5)	12.54 (-1.27-32.71)	0.79 (0.74-0.84)		739.7 (-64.39-1999.69)	9.72 (-0.85-26.24)	1287.62 (-130.65-3350.5)	12.54 (-1.27-32.71)	0.79 (0.74-0.84)
Central African Republic	27.58 (-1.87-80.69)	6.14 (-0.42-17.95)	96.84 (-6.96-281.36)	9.43 (-0.68-27.31)	1.4 (1.34-1.45)		27.58 (-1.87-80.69)	6.14 (-0.42-17.95)	96.84 (-6.96-281.36)	9.43 (-0.68-27.31)	1.4 (1.34-1.45)
Chad	59.11 (-4.37-178.51)	6.41 (-0.48-19.29)	192.78 (-13.72-588.3)	7.82 (-0.56-23.75)	0.54 (0.47-0.6)		59.11 (-4.37-178.51)	6.41 (-0.48-19.29)	192.78 (-13.72-588.3)	7.82 (-0.56-23.75)	0.54 (0.47-0.6)
Chile	533.11 (-52.93-1378.32)	17.58 (-1.75-45.36)	1207.62 (-132.57-3054.71)	22.76 (-2.5-57.67)	0.82 (0.77-0.86)		533.11 (-52.93-1378.32)	17.58 (-1.75-45.36)	1207.62 (-132.57-3054.71)	22.76 (-2.5-57.67)	0.82 (0.77-0.86)
China	28553.68 (-2368.1-81725.38)	11.9 (-0.99-33.94)	98767.67 (-8932.54-267305.38)	22.54 (-2.03-61.17)	2.48 (2.28-2.69)		28553.68 (-2368.1-81725.38)	11.9 (-0.99-33.94)	98767.67 (-8932.54-267305.38)	22.54 (-2.03-61.17)	2.48 (2.28-2.69)
Colombia	869.98 (-85.84-2388.86)	14.12 (-1.4-38.59)	2644.99 (-253.24-7049.16)	19.85 (-1.9-52.9)	1.15 (1.13-1.17)		869.98 (-85.84-2388.86)	14.12 (-1.4-38.59)	2644.99 (-253.24-7049.16)	19.85 (-1.9-52.9)	1.15 (1.13-1.17)
Comoros	5.36 (-0.4-16.13)	7.49 (-0.56-22.52)	19.83 (-1.73-54.5)	11.47 (-1-31.5)	1.44 (1.41-1.48)		5.36 (-0.4-16.13)	7.49 (-0.56-22.52)	19.83 (-1.73-54.5)	11.47 (-1-31.5)	1.44 (1.41-1.48)
Congo	32.04 (-2.55-96.04)	8.94 (-0.72-26.72)	172.09 (-16.06-482.2)	13.76 (-1.29-38.48)	1.39 (1.31-1.47)		32.04 (-2.55-96.04)	8.94 (-0.72-26.72)	172.09 (-16.06-482.2)	13.76 (-1.29-38.48)	1.39 (1.31-1.47)
Cook Islands	1.05 (-0.13-2.66)	28.3 (-3.42-71.54)	1.71 (-0.23-4.24)	35.28 (-4.77-87.68)	0.6 (0.54-0.66)		1.05 (-0.13-2.66)	28.3 (-3.42-71.54)	1.71 (-0.23-4.24)	35.28 (-4.77-87.68)	0.6 (0.54-0.66)
Costa Rica	89.88 (-9.31-247.11)	16.33 (-1.71-44.68)	278.37 (-33.06-758.49)	20.77 (-2.48-56.56)	0.82 (0.8-0.83)		89.88 (-9.31-247.11)	16.33 (-1.71-44.68)	278.37 (-33.06-758.49)	20.77 (-2.48-56.56)	0.82 (0.8-0.83)
C么te d'Ivoire	197.76 (-17.39-542.06)	11.96 (-1.05-32.72)	708.49 (-68.46-1918.92)	14.82 (-1.45-39.94)	0.69 (0.67-0.71)		197.76 (-17.39-542.06)	11.96 (-1.05-32.72)	708.49 (-68.46-1918.92)	14.82 (-1.45-39.94)	0.69 (0.67-0.71)
Croatia	127.78 (-11.33-362.19)	9.72 (-0.86-27.54)	157.96 (-16.64-413.75)	13.05 (-1.37-34.25)	1.02 (0.98-1.06)		127.78 (-11.33-362.19)	9.72 (-0.86-27.54)	157.96 (-16.64-413.75)	13.05 (-1.37-34.25)	1.02 (0.98-1.06)
Cuba	420.68 (-34.53-1150.2)	15.59 (-1.28-42.62)	704.37 (-76.87-1793.56)	21.19 (-2.3-54.58)	1.04 (1.02-1.06)		420.68 (-34.53-1150.2)	15.59 (-1.28-42.62)	704.37 (-76.87-1793.56)	21.19 (-2.3-54.58)	1.04 (1.02-1.06)
Cyprus	21.04 (-1.64-62.11)	10.39 (-0.81-30.65)	72.29 (-6.85-193.23)	15.59 (-1.48-41.69)	1.37 (1.28-1.47)		21.04 (-1.64-62.11)	10.39 (-0.81-30.65)	72.29 (-6.85-193.23)	15.59 (-1.48-41.69)	1.37 (1.28-1.47)
Czechia	324.55 (-33.28-886.38)	10.49 (-1.08-28.65)	455.91 (-47.41-1212.98)	12.63 (-1.3-33.91)	0.65 (0.63-0.67)		324.55 (-33.28-886.38)	10.49 (-1.08-28.65)	455.91 (-47.41-1212.98)	12.63 (-1.3-33.91)	0.65 (0.63-0.67)
Democratic People's Republic of Korea	410.45 (-36.93-1241.2)	7.66 (-0.69-23.25)	842.94 (-71.74-2416.34)	10.75 (-0.91-30.97)	1.03 (0.93-1.14)		410.45 (-36.93-1241.2)	7.66 (-0.69-23.25)	842.94 (-71.74-2416.34)	10.75 (-0.91-30.97)	1.03 (0.93-1.14)
Democratic Republic of the Congo	268.44 (-18.25-803.78)	4.65 (-0.32-13.92)	1303.06 (-86.21-3688.85)	8.6 (-0.57-24.3)	1.95 (1.86-2.03)		268.44 (-18.25-803.78)	4.65 (-0.32-13.92)	1303.06 (-86.21-3688.85)	8.6 (-0.57-24.3)	1.95 (1.86-2.03)
Denmark	164.92 (-12.68-470.05)	10.66 (-0.82-30.37)	227.86 (-21.6-623.78)	14.48 (-1.37-39.78)	1 (0.95-1.06)		164.92 (-12.68-470.05)	10.66 (-0.82-30.37)	227.86 (-21.6-623.78)	14.48 (-1.37-39.78)	1 (0.95-1.06)
Djibouti	3.31 (-0.27-9.53)	5.17 (-0.43-14.87)	22.91 (-1.6-67.77)	7.74 (-0.54-22.81)	1.3 (1.28-1.32)		3.31 (-0.27-9.53)	5.17 (-0.43-14.87)	22.91 (-1.6-67.77)	7.74 (-0.54-22.81)	1.3 (1.28-1.32)
Dominica	2.37 (-0.24-6.03)	18.25 (-1.83-46.44)	3.8 (-0.5-9.64)	22.92 (-3.03-58.15)	0.71 (0.67-0.74)		2.37 (-0.24-6.03)	18.25 (-1.83-46.44)	3.8 (-0.5-9.64)	22.92 (-3.03-58.15)	0.71 (0.67-0.74)
Dominican Republic	173.18 (-16.48-475.55)	14.01 (-1.35-38.26)	553.88 (-60.82-1433.83)	20.16 (-2.22-52.18)	1.26 (1.21-1.3)		173.18 (-16.48-475.55)	14.01 (-1.35-38.26)	553.88 (-60.82-1433.83)	20.16 (-2.22-52.18)	1.26 (1.21-1.3)
Ecuador	342.51 (-34.27-894.12)	19.19 (-1.93-49.77)	1166.61 (-136.18-2946.06)	25.74 (-3.01-64.99)	1.27 (1.15-1.4)		342.51 (-34.27-894.12)	19.19 (-1.93-49.77)	1166.61 (-136.18-2946.06)	25.74 (-3.01-64.99)	1.27 (1.15-1.4)
Egypt	1644.84 (-180.92-4318.94)	15.89 (-1.76-41.59)	4938.88 (-664.7-12351.34)	21.67 (-2.92-54.07)	1.01 (0.98-1.04)		1644.84 (-180.92-4318.94)	15.89 (-1.76-41.59)	4938.88 (-664.7-12351.34)	21.67 (-2.92-54.07)	1.01 (0.98-1.04)
El Salvador	155.74 (-15.86-429.14)	16.81 (-1.73-46.3)	379.91 (-40.19-988.36)	21.81 (-2.31-56.78)	0.85 (0.8-0.89)		155.74 (-15.86-429.14)	16.81 (-1.73-46.3)	379.91 (-40.19-988.36)	21.81 (-2.31-56.78)	0.85 (0.8-0.89)
Equatorial Guinea	6.42 (-0.55-18.52)	8.72 (-0.75-25.17)	38.1 (-3.66-102.83)	14.64 (-1.43-39.35)	1.74 (1.68-1.79)		6.42 (-0.55-18.52)	8.72 (-0.75-25.17)	38.1 (-3.66-102.83)	14.64 (-1.43-39.35)	1.74 (1.68-1.79)
Eritrea	20.37 (-1.73-61.57)	3.64 (-0.31-11)	68.6 (-5.1-222.73)	5.27 (-0.39-17.05)	1.06 (1-1.11)		20.37 (-1.73-61.57)	3.64 (-0.31-11)	68.6 (-5.1-222.73)	5.27 (-0.39-17.05)	1.06 (1-1.11)
Estonia	49.65 (-4.22-134.4)	11.72 (-1-31.72)	51.4 (-4.86-134.2)	13.72 (-1.29-35.95)	0.59 (0.56-0.62)		49.65 (-4.22-134.4)	11.72 (-1-31.72)	51.4 (-4.86-134.2)	13.72 (-1.29-35.95)	0.59 (0.56-0.62)
Eswatini	18.23 (-1.9-47.39)	14.73 (-1.54-38.14)	41.01 (-4.8-106.54)	17.81 (-2.11-46.05)	0.54 (0.48-0.61)		18.23 (-1.9-47.39)	14.73 (-1.54-38.14)	41.01 (-4.8-106.54)	17.81 (-2.11-46.05)	0.54 (0.48-0.61)
Ethiopia	352.36 (-26.69-1033.23)	4.78 (-0.36-14)	953.32 (-75.75-2602.59)	5.2 (-0.41-14.12)	0.15 (0.11-0.19)		352.36 (-26.69-1033.23)	4.78 (-0.36-14)	953.32 (-75.75-2602.59)	5.2 (-0.41-14.12)	0.15 (0.11-0.19)
Fiji	35.23 (-3.51-91.05)	22.89 (-2.28-59.01)	69.61 (-7.98-175.68)	30.67 (-3.52-77.26)	0.86 (0.81-0.9)		35.23 (-3.51-91.05)	22.89 (-2.28-59.01)	69.61 (-7.98-175.68)	30.67 (-3.52-77.26)	0.86 (0.81-0.9)
Finland	196.21 (-17.68-563.32)	12.83 (-1.16-36.81)	225.81 (-19.28-600.35)	16.36 (-1.39-43.52)	0.8 (0.74-0.87)		196.21 (-17.68-563.32)	12.83 (-1.16-36.81)	225.81 (-19.28-600.35)	16.36 (-1.39-43.52)	0.8 (0.74-0.87)
France	1426.97 (-120.9-4089.55)	9.81 (-0.84-27.99)	2698.1 (-227.3-7109.87)	14.91 (-1.25-39.46)	1.41 (1.3-1.52)		1426.97 (-120.9-4089.55)	9.81 (-0.84-27.99)	2698.1 (-227.3-7109.87)	14.91 (-1.25-39.46)	1.41 (1.3-1.52)
Gabon	18.07 (-1.71-49.13)	12.86 (-1.22-34.99)	68.89 (-8.12-178.57)	17.71 (-2.09-45.86)	1.01 (0.99-1.03)		18.07 (-1.71-49.13)	12.86 (-1.22-34.99)	68.89 (-8.12-178.57)	17.71 (-2.09-45.86)	1.01 (0.99-1.03)
Gambia	14.41 (-1.17-40.59)	11.32 (-0.94-31.77)	59.38 (-6.21-158.54)	14.75 (-1.55-39.13)	0.81 (0.77-0.85)		14.41 (-1.17-40.59)	11.32 (-0.94-31.77)	59.38 (-6.21-158.54)	14.75 (-1.55-39.13)	0.81 (0.77-0.85)
Georgia	122.28 (-10.74-340.4)	9.68 (-0.85-26.93)	108.68 (-12.09-283.64)	10.83 (-1.2-28.3)	0.42 (0.4-0.44)		122.28 (-10.74-340.4)	9.68 (-0.85-26.93)	108.68 (-12.09-283.64)	10.83 (-1.2-28.3)	0.42 (0.4-0.44)
Germany	2870.91 (-246.09-7903.29)	13.42 (-1.15-36.99)	3446.68 (-345.38-9328.06)	16.11 (-1.61-43.66)	0.6 (0.56-0.63)		2870.91 (-246.09-7903.29)	13.42 (-1.15-36.99)	3446.68 (-345.38-9328.06)	16.11 (-1.61-43.66)	0.6 (0.56-0.63)
Ghana	227.85 (-18.26-672.15)	9.64 (-0.78-28.41)	1129.84 (-108.7-3043.1)	15.61 (-1.5-41.93)	1.57 (1.51-1.63)		227.85 (-18.26-672.15)	9.64 (-0.78-28.41)	1129.84 (-108.7-3043.1)	15.61 (-1.5-41.93)	1.57 (1.51-1.63)
Greece	353.52 (-31.41-981.81)	12.86 (-1.14-35.78)	541.4 (-45.42-1449.83)	16.7 (-1.4-44.88)	0.82 (0.77-0.88)		353.52 (-31.41-981.81)	12.86 (-1.14-35.78)	541.4 (-45.42-1449.83)	16.7 (-1.4-44.88)	0.82 (0.77-0.88)
Greenland	1.38 (-0.13-3.74)	11.55 (-1.05-31.3)	1.69 (-0.18-4.44)	13.89 (-1.45-36.44)	0.65 (0.62-0.68)		1.38 (-0.13-3.74)	11.55 (-1.05-31.3)	1.69 (-0.18-4.44)	13.89 (-1.45-36.44)	0.65 (0.62-0.68)
Grenada	2.08 (-0.19-5.57)	15.88 (-1.48-42.25)	5.81 (-0.69-14.88)	21.35 (-2.52-54.88)	0.96 (0.92-1)		2.08 (-0.19-5.57)	15.88 (-1.48-42.25)	5.81 (-0.69-14.88)	21.35 (-2.52-54.88)	0.96 (0.92-1)
Guam	6 (-0.61-15.84)	22.74 (-2.34-59.81)	11.85 (-1.36-30.54)	28.73 (-3.28-74.23)	0.73 (0.71-0.74)		6 (-0.61-15.84)	22.74 (-2.34-59.81)	11.85 (-1.36-30.54)	28.73 (-3.28-74.23)	0.73 (0.71-0.74)
Guatemala	207.65 (-20.23-538.69)	16.22 (-1.59-42.01)	742.12 (-84.73-1911.96)	20.49 (-2.34-52.68)	0.74 (0.73-0.75)		207.65 (-20.23-538.69)	16.22 (-1.59-42.01)	742.12 (-84.73-1911.96)	20.49 (-2.34-52.68)	0.74 (0.73-0.75)
Guinea	96.09 (-8.27-283.09)	9.29 (-0.81-27.32)	261.08 (-23-699.02)	11.58 (-1.02-30.78)	0.7 (0.65-0.76)		96.09 (-8.27-283.09)	9.29 (-0.81-27.32)	261.08 (-23-699.02)	11.58 (-1.02-30.78)	0.7 (0.65-0.76)
Guinea-Bissau	14.73 (-1.36-42.48)	9.43 (-0.87-27.08)	43.58 (-4.13-123.44)	12.1 (-1.17-34.24)	0.77 (0.75-0.79)		14.73 (-1.36-42.48)	9.43 (-0.87-27.08)	43.58 (-4.13-123.44)	12.1 (-1.17-34.24)	0.77 (0.75-0.79)
Guyana	19.73 (-1.88-54.73)	14.53 (-1.39-40.31)	36.39 (-3.97-97.65)	18.94 (-2.06-50.86)	0.84 (0.82-0.87)		19.73 (-1.88-54.73)	14.53 (-1.39-40.31)	36.39 (-3.97-97.65)	18.94 (-2.06-50.86)	0.84 (0.82-0.87)
Haiti	98.47 (-7.66-277.82)	8.91 (-0.7-24.94)	424.55 (-34.65-1164.95)	13.8 (-1.13-37.75)	1.56 (1.51-1.6)		98.47 (-7.66-277.82)	8.91 (-0.7-24.94)	424.55 (-34.65-1164.95)	13.8 (-1.13-37.75)	1.56 (1.51-1.6)
Honduras	88.84 (-7.85-246.98)	12.61 (-1.12-34.99)	396.33 (-36.54-1080.65)	17.17 (-1.59-46.73)	0.97 (0.89-1.04)		88.84 (-7.85-246.98)	12.61 (-1.12-34.99)	396.33 (-36.54-1080.65)	17.17 (-1.59-46.73)	0.97 (0.89-1.04)
Hungary	350.03 (-32.61-942.74)	11.5 (-1.07-30.98)	451.48 (-46.6-1176.38)	13.76 (-1.4-36.04)	0.61 (0.6-0.62)		350.03 (-32.61-942.74)	11.5 (-1.07-30.98)	451.48 (-46.6-1176.38)	13.76 (-1.4-36.04)	0.61 (0.6-0.62)
Iceland	8.59 (-0.73-23.6)	14.49 (-1.24-39.78)	16.56 (-1.56-44.75)	17.85 (-1.68-48.28)	0.72 (0.69-0.75)		8.59 (-0.73-23.6)	14.49 (-1.24-39.78)	16.56 (-1.56-44.75)	17.85 (-1.68-48.28)	0.72 (0.69-0.75)
India	11345.15 (-867.73-32707.97)	7.13 (-0.55-20.54)	44768.47 (-3658.58-129808.61)	12.67 (-1.04-36.69)	2.22 (2.01-2.43)		11345.15 (-867.73-32707.97)	7.13 (-0.55-20.54)	44768.47 (-3658.58-129808.61)	12.67 (-1.04-36.69)	2.22 (2.01-2.43)
Indonesia	2241.98 (-179.26-6605.22)	6.29 (-0.5-18.52)	9962.89 (-853.6-27614.09)	12.03 (-1.03-33.36)	2.25 (2.13-2.38)		2241.98 (-179.26-6605.22)	6.29 (-0.5-18.52)	9962.89 (-853.6-27614.09)	12.03 (-1.03-33.36)	2.25 (2.13-2.38)
Iran (Islamic Republic of)	839.94 (-78.29-2289.85)	10.46 (-0.98-28.43)	4192.58 (-466.35-10492.97)	15.89 (-1.77-39.66)	1.33 (1.3-1.35)		839.94 (-78.29-2289.85)	10.46 (-0.98-28.43)	4192.58 (-466.35-10492.97)	15.89 (-1.77-39.66)	1.33 (1.3-1.35)
Iraq	400.98 (-34.69-1085.06)	15.23 (-1.31-41.02)	1677 (-189.66-4269.4)	18.07 (-2.04-45.99)	0.59 (0.56-0.61)		400.98 (-34.69-1085.06)	15.23 (-1.31-41.02)	1677 (-189.66-4269.4)	18.07 (-2.04-45.99)	0.59 (0.56-0.61)
Ireland	113.55 (-11.01-320.43)	13.49 (-1.31-38.04)	266.33 (-28.41-700.1)	16.93 (-1.8-44.62)	0.78 (0.74-0.82)		113.55 (-11.01-320.43)	13.49 (-1.31-38.04)	266.33 (-28.41-700.1)	16.93 (-1.8-44.62)	0.78 (0.74-0.82)
Israel	143.31 (-12.67-401.93)	13.26 (-1.18-36.92)	402.51 (-35.38-1087.93)	16.24 (-1.43-43.94)	0.62 (0.58-0.66)		143.31 (-12.67-401.93)	13.26 (-1.18-36.92)	402.51 (-35.38-1087.93)	16.24 (-1.43-43.94)	0.62 (0.58-0.66)
Italy	1547.92 (-131.7-4395.18)	9.93 (-0.84-28.22)	2407.04 (-203.55-6564.98)	12.73 (-1.08-34.95)	0.72 (0.68-0.76)		1547.92 (-131.7-4395.18)	9.93 (-0.84-28.22)	2407.04 (-203.55-6564.98)	12.73 (-1.08-34.95)	0.72 (0.68-0.76)
Jamaica	68.77 (-7.16-187.76)	17.42 (-1.82-47.45)	167.28 (-21.35-429.39)	22.42 (-2.86-57.56)	0.86 (0.82-0.9)		68.77 (-7.16-187.76)	17.42 (-1.82-47.45)	167.28 (-21.35-429.39)	22.42 (-2.86-57.56)	0.86 (0.82-0.9)
Japan	4321.79 (-353.3-12479.17)	10.48 (-0.86-30.28)	4729.63 (-380.36-13550.4)	12.17 (-0.98-35)	0.46 (0.42-0.5)		4321.79 (-353.3-12479.17)	10.48 (-0.86-30.28)	4729.63 (-380.36-13550.4)	12.17 (-0.98-35)	0.46 (0.42-0.5)
Jordan	79.71 (-8.68-215.02)	15.74 (-1.72-42.37)	592.51 (-76.63-1518.12)	21.45 (-2.78-54.92)	1.02 (0.99-1.04)		79.71 (-8.68-215.02)	15.74 (-1.72-42.37)	592.51 (-76.63-1518.12)	21.45 (-2.78-54.92)	1.02 (0.99-1.04)
Kazakhstan	309.17 (-29.39-852.74)	9.66 (-0.93-26.45)	626.92 (-69.4-1674.18)	11.86 (-1.31-31.69)	0.66 (0.64-0.69)		309.17 (-29.39-852.74)	9.66 (-0.93-26.45)	626.92 (-69.4-1674.18)	11.86 (-1.31-31.69)	0.66 (0.64-0.69)
Kenya	230.58 (-19.3-660.36)	7.73 (-0.65-22.09)	1063.53 (-98.61-2866.42)	11.37 (-1.05-30.56)	1.24 (1.21-1.27)		230.58 (-19.3-660.36)	7.73 (-0.65-22.09)	1063.53 (-98.61-2866.42)	11.37 (-1.05-30.56)	1.24 (1.21-1.27)
Kiribati	3.14 (-0.34-8.29)	23.44 (-2.52-61.56)	8.16 (-1.11-20.65)	29.63 (-4.07-74.83)	0.67 (0.59-0.74)		3.14 (-0.34-8.29)	23.44 (-2.52-61.56)	8.16 (-1.11-20.65)	29.63 (-4.07-74.83)	0.67 (0.59-0.74)
Kuwait	44.71 (-5.2-114.66)	16.89 (-1.99-42.91)	405.71 (-53.01-1044.58)	23.04 (-3.03-59.2)	1.04 (1-1.07)		44.71 (-5.2-114.66)	16.89 (-1.99-42.91)	405.71 (-53.01-1044.58)	23.04 (-3.03-59.2)	1.04 (1-1.07)
Kyrgyzstan	57.49 (-5.6-158.36)	8.91 (-0.89-24.24)	175.08 (-19.86-459.34)	11.01 (-1.25-28.89)	0.69 (0.67-0.72)		57.49 (-5.6-158.36)	8.91 (-0.89-24.24)	175.08 (-19.86-459.34)	11.01 (-1.25-28.89)	0.69 (0.67-0.72)
Lao People's Democratic Republic	42.53 (-3.03-130.88)	6.09 (-0.43-18.72)	190.27 (-14.19-543.15)	11.25 (-0.84-32.08)	2.27 (2.14-2.39)		42.53 (-3.03-130.88)	6.09 (-0.43-18.72)	190.27 (-14.19-543.15)	11.25 (-0.84-32.08)	2.27 (2.14-2.39)
Latvia	89.27 (-8.88-235.33)	11.93 (-1.18-31.54)	76.08 (-7.86-198.25)	13.91 (-1.42-36.47)	0.55 (0.53-0.56)		89.27 (-8.88-235.33)	11.93 (-1.18-31.54)	76.08 (-7.86-198.25)	13.91 (-1.42-36.47)	0.55 (0.53-0.56)
Lebanon	82.99 (-8.4-221.39)	12.94 (-1.31-34.5)	276.35 (-29.98-692.42)	17.61 (-1.91-44.06)	1.01 (0.98-1.03)		82.99 (-8.4-221.39)	12.94 (-1.31-34.5)	276.35 (-29.98-692.42)	17.61 (-1.91-44.06)	1.01 (0.98-1.03)
Lesotho	36.8 (-3.39-98.59)	11.93 (-1.1-31.93)	55.93 (-6.01-144.9)	15.07 (-1.62-38.9)	0.73 (0.7-0.75)		36.8 (-3.39-98.59)	11.93 (-1.1-31.93)	55.93 (-6.01-144.9)	15.07 (-1.62-38.9)	0.73 (0.7-0.75)
Liberia	41.42 (-3.7-111.12)	12.21 (-1.1-32.53)	169.44 (-17.61-455.01)	15.27 (-1.6-40.92)	0.76 (0.72-0.81)		41.42 (-3.7-111.12)	12.21 (-1.1-32.53)	169.44 (-17.61-455.01)	15.27 (-1.6-40.92)	0.76 (0.72-0.81)
Libya	79.33 (-8.27-215.35)	14.56 (-1.53-39.39)	462.93 (-60.42-1213.8)	20.62 (-2.69-54.07)	1.16 (1.13-1.18)		79.33 (-8.27-215.35)	14.56 (-1.53-39.39)	462.93 (-60.42-1213.8)	20.62 (-2.69-54.07)	1.16 (1.13-1.18)
Lithuania	101.57 (-8.45-285.03)	10.3 (-0.86-28.96)	101.26 (-10.09-268.59)	13.07 (-1.29-34.84)	0.78 (0.75-0.82)		101.57 (-8.45-285.03)	10.3 (-0.86-28.96)	101.26 (-10.09-268.59)	13.07 (-1.29-34.84)	0.78 (0.75-0.82)
Luxembourg	12.57 (-1.01-35.34)	12.05 (-0.96-33.83)	31.35 (-2.67-87.89)	15.68 (-1.33-44.02)	0.86 (0.83-0.89)		12.57 (-1.01-35.34)	12.05 (-0.96-33.83)	31.35 (-2.67-87.89)	15.68 (-1.33-44.02)	0.86 (0.83-0.89)
Madagascar	74.77 (-5.34-230.73)	4.38 (-0.31-13.47)	353.61 (-25.59-1088.04)	6.71 (-0.49-20.59)	1.31 (1.21-1.4)		74.77 (-5.34-230.73)	4.38 (-0.31-13.47)	353.61 (-25.59-1088.04)	6.71 (-0.49-20.59)	1.31 (1.21-1.4)
Malawi	97.74 (-7.11-282.84)	6.81 (-0.5-19.62)	339.79 (-29.55-935.8)	10.65 (-0.94-29.34)	1.47 (1.44-1.51)		97.74 (-7.11-282.84)	6.81 (-0.5-19.62)	339.79 (-29.55-935.8)	10.65 (-0.94-29.34)	1.47 (1.44-1.51)
Malaysia	418.64 (-37.72-1200.99)	12.75 (-1.16-36.59)	1496.88 (-148.48-3873.8)	19.15 (-1.91-49.47)	1.33 (1.27-1.38)		418.64 (-37.72-1200.99)	12.75 (-1.16-36.59)	1496.88 (-148.48-3873.8)	19.15 (-1.91-49.47)	1.33 (1.27-1.38)
Maldives	3.05 (-0.24-8.4)	10.39 (-0.83-28.65)	20.76 (-2.11-54.55)	17.98 (-1.84-47.06)	1.92 (1.87-1.98)		3.05 (-0.24-8.4)	10.39 (-0.83-28.65)	20.76 (-2.11-54.55)	17.98 (-1.84-47.06)	1.92 (1.87-1.98)
Mali	101.23 (-7.3-296.8)	7.34 (-0.53-21.47)	392.32 (-34.41-1059.61)	11.36 (-1.01-30.53)	1.55 (1.43-1.67)		101.23 (-7.3-296.8)	7.34 (-0.53-21.47)	392.32 (-34.41-1059.61)	11.36 (-1.01-30.53)	1.55 (1.43-1.67)
Malta	12.36 (-0.95-34.21)	11.25 (-0.87-31.18)	20.29 (-1.87-55.08)	16.3 (-1.5-44.39)	1.16 (1.03-1.29)		12.36 (-0.95-34.21)	11.25 (-0.87-31.18)	20.29 (-1.87-55.08)	16.3 (-1.5-44.39)	1.16 (1.03-1.29)
Marshall Islands	1.33 (-0.15-3.47)	23.18 (-2.68-60.02)	4.04 (-0.48-10.13)	28.91 (-3.43-72.45)	0.61 (0.57-0.65)		1.33 (-0.15-3.47)	23.18 (-2.68-60.02)	4.04 (-0.48-10.13)	28.91 (-3.43-72.45)	0.61 (0.57-0.65)
Mauritania	44.17 (-4.27-121.54)	13.93 (-1.36-38.13)	137.6 (-14.71-356.88)	17.59 (-1.89-45.6)	0.76 (0.74-0.77)		44.17 (-4.27-121.54)	13.93 (-1.36-38.13)	137.6 (-14.71-356.88)	17.59 (-1.89-45.6)	0.76 (0.74-0.77)
Mauritius	28.86 (-2.43-79.51)	12.35 (-1.05-33.79)	70.88 (-6.79-187.74)	18.84 (-1.8-50)	1.37 (1.32-1.41)		28.86 (-2.43-79.51)	12.35 (-1.05-33.79)	70.88 (-6.79-187.74)	18.84 (-1.8-50)	1.37 (1.32-1.41)
Mexico	2480.86 (-256.43-6551.28)	16.54 (-1.72-43.61)	7627.32 (-871.32-19280.91)	20.31 (-2.32-51.39)	0.63 (0.61-0.65)		2480.86 (-256.43-6551.28)	16.54 (-1.72-43.61)	7627.32 (-871.32-19280.91)	20.31 (-2.32-51.39)	0.63 (0.61-0.65)
Micronesia (Federated States of)	3.61 (-0.41-9.03)	24.52 (-2.79-60.97)	7.25 (-0.85-18.02)	30.61 (-3.59-76.12)	0.63 (0.56-0.7)		3.61 (-0.41-9.03)	24.52 (-2.79-60.97)	7.25 (-0.85-18.02)	30.61 (-3.59-76.12)	0.63 (0.56-0.7)
Monaco	1.45 (-0.12-3.92)	14.73 (-1.24-39.82)	1.81 (-0.2-4.78)	17.43 (-1.89-46.18)	0.56 (0.53-0.59)		1.45 (-0.12-3.92)	14.73 (-1.24-39.82)	1.81 (-0.2-4.78)	17.43 (-1.89-46.18)	0.56 (0.53-0.59)
Mongolia	24.85 (-2.31-67.67)	8.02 (-0.75-21.79)	91.47 (-9.18-244.1)	9.9 (-0.99-26.42)	0.64 (0.59-0.69)		24.85 (-2.31-67.67)	8.02 (-0.75-21.79)	91.47 (-9.18-244.1)	9.9 (-0.99-26.42)	0.64 (0.59-0.69)
Montenegro	15.13 (-1.31-42.3)	10.25 (-0.89-28.6)	24.68 (-2.46-65.38)	13.34 (-1.32-35.42)	0.87 (0.85-0.89)		15.13 (-1.31-42.3)	10.25 (-0.89-28.6)	24.68 (-2.46-65.38)	13.34 (-1.32-35.42)	0.87 (0.85-0.89)
Morocco	576.09 (-58.74-1604.07)	12.68 (-1.3-35.24)	1749.86 (-206.88-4460.38)	17.37 (-2.05-44.26)	1.04 (1.03-1.05)		576.09 (-58.74-1604.07)	12.68 (-1.3-35.24)	1749.86 (-206.88-4460.38)	17.37 (-2.05-44.26)	1.04 (1.03-1.05)
Mozambique	145.63 (-11.02-450.5)	6.21 (-0.47-19.27)	506.14 (-40.01-1454.73)	9.98 (-0.79-28.65)	1.65 (1.58-1.72)		145.63 (-11.02-450.5)	6.21 (-0.47-19.27)	506.14 (-40.01-1454.73)	9.98 (-0.79-28.65)	1.65 (1.58-1.72)
Myanmar	593 (-44.07-1740.69)	8.21 (-0.61-24.05)	1818.56 (-161.96-5141.12)	11.83 (-1.05-33.44)	1.2 (1.13-1.26)		593 (-44.07-1740.69)	8.21 (-0.61-24.05)	1818.56 (-161.96-5141.12)	11.83 (-1.05-33.44)	1.2 (1.13-1.26)
Namibia	21.6 (-1.73-62.14)	9.91 (-0.8-28.49)	74.65 (-6.26-192.38)	13.76 (-1.15-35.4)	1.02 (0.98-1.05)		21.6 (-1.73-62.14)	9.91 (-0.8-28.49)	74.65 (-6.26-192.38)	13.76 (-1.15-35.4)	1.02 (0.98-1.05)
Nauru	0.49 (-0.06-1.24)	26.74 (-3.22-67.87)	0.76 (-0.11-1.9)	32.38 (-4.76-80.85)	0.52 (0.49-0.55)		0.49 (-0.06-1.24)	26.74 (-3.22-67.87)	0.76 (-0.11-1.9)	32.38 (-4.76-80.85)	0.52 (0.49-0.55)
Nepal	257.16 (-20.44-796.26)	7.55 (-0.6-23.34)	1119.05 (-92.08-3231.39)	14.54 (-1.2-41.99)	2.43 (2.26-2.61)		257.16 (-20.44-796.26)	7.55 (-0.6-23.34)	1119.05 (-92.08-3231.39)	14.54 (-1.2-41.99)	2.43 (2.26-2.61)
Netherlands	518.28 (-46.59-1470.54)	12.45 (-1.13-35.3)	765.4 (-69.68-2041.2)	16.82 (-1.52-45.01)	1.01 (0.94-1.07)		518.28 (-46.59-1470.54)	12.45 (-1.13-35.3)	765.4 (-69.68-2041.2)	16.82 (-1.52-45.01)	1.01 (0.94-1.07)
New Zealand	126.67 (-11.53-355.04)	14.42 (-1.32-40.38)	257.42 (-27.11-693.31)	18.71 (-1.95-50.52)	0.88 (0.86-0.9)		126.67 (-11.53-355.04)	14.42 (-1.32-40.38)	257.42 (-27.11-693.31)	18.71 (-1.95-50.52)	0.88 (0.86-0.9)
Nicaragua	94.41 (-9.91-249.04)	16.89 (-1.78-44.39)	350.55 (-40.61-915.62)	21.18 (-2.47-55.2)	0.75 (0.71-0.79)		94.41 (-9.91-249.04)	16.89 (-1.78-44.39)	350.55 (-40.61-915.62)	21.18 (-2.47-55.2)	0.75 (0.71-0.79)
Niger	105.87 (-7.91-303.45)	9.08 (-0.68-25.96)	347.25 (-29.63-1007.61)	10.53 (-0.91-30.53)	0.46 (0.45-0.47)		105.87 (-7.91-303.45)	9.08 (-0.68-25.96)	347.25 (-29.63-1007.61)	10.53 (-0.91-30.53)	0.46 (0.45-0.47)
Nigeria	1009.68 (-93.11-2809.84)	8.15 (-0.75-22.62)	4801.17 (-462.84-12707.57)	11.98 (-1.16-31.64)	1.22 (1.05-1.39)		1009.68 (-93.11-2809.84)	8.15 (-0.75-22.62)	4801.17 (-462.84-12707.57)	11.98 (-1.16-31.64)	1.22 (1.05-1.39)
Niue	0.12 (-0.01-0.31)	24.56 (-2.82-62.92)	0.15 (-0.02-0.36)	32.52 (-4-80.02)	0.85 (0.78-0.91)		0.12 (-0.01-0.31)	24.56 (-2.82-62.92)	0.15 (-0.02-0.36)	32.52 (-4-80.02)	0.85 (0.78-0.91)
North Macedonia	51.59 (-4.79-138.16)	10.27 (-0.95-27.5)	89.72 (-9.93-237.64)	13.11 (-1.44-34.79)	0.84 (0.82-0.86)		51.59 (-4.79-138.16)	10.27 (-0.95-27.5)	89.72 (-9.93-237.64)	13.11 (-1.44-34.79)	0.84 (0.82-0.86)
Northern Mariana Islands	2.41 (-0.25-6.29)	26.56 (-2.8-68.76)	5.43 (-0.67-13.5)	32.93 (-4-82.43)	0.62 (0.54-0.69)		2.41 (-0.25-6.29)	26.56 (-2.8-68.76)	5.43 (-0.67-13.5)	32.93 (-4-82.43)	0.62 (0.54-0.69)
Norway	123.54 (-10.79-340.55)	10.85 (-0.95-29.87)	210.18 (-20.55-566.06)	14.01 (-1.36-37.79)	0.86 (0.82-0.9)		123.54 (-10.79-340.55)	10.85 (-0.95-29.87)	210.18 (-20.55-566.06)	14.01 (-1.36-37.79)	0.86 (0.82-0.9)
Oman	30.2 (-2.93-81.96)	13.1 (-1.27-35.42)	203.43 (-26.5-516.12)	21.67 (-2.86-55.01)	1.76 (1.71-1.8)		30.2 (-2.93-81.96)	13.1 (-1.27-35.42)	203.43 (-26.5-516.12)	21.67 (-2.86-55.01)	1.76 (1.71-1.8)
Pakistan	1461.56 (-119.45-4303.73)	8.03 (-0.66-23.64)	6656.49 (-631.92-18292.32)	13.43 (-1.28-36.85)	2.05 (1.92-2.19)		1461.56 (-119.45-4303.73)	8.03 (-0.66-23.64)	6656.49 (-631.92-18292.32)	13.43 (-1.28-36.85)	2.05 (1.92-2.19)
Palau	0.8 (-0.09-2.05)	24.21 (-2.68-61.98)	1.78 (-0.22-4.52)	31.35 (-3.86-80.1)	0.73 (0.67-0.8)		0.8 (-0.09-2.05)	24.21 (-2.68-61.98)	1.78 (-0.22-4.52)	31.35 (-3.86-80.1)	0.73 (0.67-0.8)
Palestine	42.14 (-4.78-110.32)	15.07 (-1.71-39.43)	192.24 (-26.19-485.41)	19.34 (-2.65-48.74)	0.76 (0.73-0.79)		42.14 (-4.78-110.32)	15.07 (-1.71-39.43)	192.24 (-26.19-485.41)	19.34 (-2.65-48.74)	0.76 (0.73-0.79)
Panama	53.17 (-4.23-156.45)	11.57 (-0.92-34.04)	200.02 (-17.45-531.21)	18.33 (-1.6-48.72)	1.47 (1.36-1.58)		53.17 (-4.23-156.45)	11.57 (-0.92-34.04)	200.02 (-17.45-531.21)	18.33 (-1.6-48.72)	1.47 (1.36-1.58)
Papua New Guinea	90.55 (-8.05-261.61)	13.4 (-1.19-38.6)	404.57 (-38.43-1152.86)	18.16 (-1.74-51.68)	0.91 (0.84-0.99)		90.55 (-8.05-261.61)	13.4 (-1.19-38.6)	404.57 (-38.43-1152.86)	18.16 (-1.74-51.68)	0.91 (0.84-0.99)
Paraguay	104.84 (-9.88-284.01)	15.16 (-1.43-40.95)	327.93 (-35.96-868.96)	19.48 (-2.14-51.48)	0.82 (0.8-0.83)		104.84 (-9.88-284.01)	15.16 (-1.43-40.95)	327.93 (-35.96-868.96)	19.48 (-2.14-51.48)	0.82 (0.8-0.83)
Peru	632.66 (-65.01-1683.18)	16.16 (-1.67-42.83)	2151.19 (-217.63-5593.63)	22.24 (-2.25-57.81)	1.08 (1.06-1.09)		632.66 (-65.01-1683.18)	16.16 (-1.67-42.83)	2151.19 (-217.63-5593.63)	22.24 (-2.25-57.81)	1.08 (1.06-1.09)
Philippines	751.18 (-59.99-2127.55)	6.83 (-0.55-19.32)	2826.98 (-234.73-7764.58)	10.77 (-0.89-29.54)	1.43 (1.33-1.52)		751.18 (-59.99-2127.55)	6.83 (-0.55-19.32)	2826.98 (-234.73-7764.58)	10.77 (-0.89-29.54)	1.43 (1.33-1.52)
Poland	774.42 (-67.15-2121.8)	8.33 (-0.73-22.77)	1351.24 (-129.83-3652.88)	11.11 (-1.07-30.07)	0.95 (0.91-0.99)		774.42 (-67.15-2121.8)	8.33 (-0.73-22.77)	1351.24 (-129.83-3652.88)	11.11 (-1.07-30.07)	0.95 (0.91-0.99)
Portugal	333.27 (-32.01-947.07)	12.56 (-1.21-35.69)	581.63 (-57.01-1562.11)	16.49 (-1.61-44.4)	0.78 (0.71-0.85)		333.27 (-32.01-947.07)	12.56 (-1.21-35.69)	581.63 (-57.01-1562.11)	16.49 (-1.61-44.4)	0.78 (0.71-0.85)
Puerto Rico	186.76 (-18.61-488.21)	19.52 (-1.94-50.99)	229.76 (-26.67-597.94)	24.27 (-2.81-63.37)	0.76 (0.71-0.8)		186.76 (-18.61-488.21)	19.52 (-1.94-50.99)	229.76 (-26.67-597.94)	24.27 (-2.81-63.37)	0.76 (0.71-0.8)
Qatar	9.58 (-0.95-24.97)	16.77 (-1.7-43.28)	130.14 (-16.46-325.92)	23.47 (-3.03-58.05)	1.11 (1.09-1.12)		9.58 (-0.95-24.97)	16.77 (-1.7-43.28)	130.14 (-16.46-325.92)	23.47 (-3.03-58.05)	1.11 (1.09-1.12)
Republic of Korea	1057.57 (-91.91-3290.93)	10.45 (-0.91-32.55)	2716.82 (-254.8-8002.49)	15.93 (-1.48-47.04)	1.48 (1.42-1.53)		1057.57 (-91.91-3290.93)	10.45 (-0.91-32.55)	2716.82 (-254.8-8002.49)	15.93 (-1.48-47.04)	1.48 (1.42-1.53)
Republic of Moldova	115.45 (-10.96-321.55)	10.87 (-1.04-30.19)	170.15 (-18.09-438.79)	14.47 (-1.53-37.36)	1.01 (0.98-1.05)		115.45 (-10.96-321.55)	10.87 (-1.04-30.19)	170.15 (-18.09-438.79)	14.47 (-1.53-37.36)	1.01 (0.98-1.05)
Romania	557.24 (-47.08-1535.18)	9.79 (-0.83-26.93)	758.88 (-67.12-2018.54)	12.73 (-1.12-34.05)	0.85 (0.81-0.9)		557.24 (-47.08-1535.18)	9.79 (-0.83-26.93)	758.88 (-67.12-2018.54)	12.73 (-1.12-34.05)	0.85 (0.81-0.9)
Russian Federation	3548.74 (-335.92-9549.16)	10.19 (-0.97-27.26)	5948.37 (-646.22-15130.31)	12.84 (-1.39-32.69)	0.78 (0.76-0.8)		3548.74 (-335.92-9549.16)	10.19 (-0.97-27.26)	5948.37 (-646.22-15130.31)	12.84 (-1.39-32.69)	0.78 (0.76-0.8)
Rwanda	60.14 (-4.44-174.98)	5.99 (-0.44-17.42)	243.78 (-22.99-693.41)	9.04 (-0.86-25.6)	1.26 (1.15-1.37)		60.14 (-4.44-174.98)	5.99 (-0.44-17.42)	243.78 (-22.99-693.41)	9.04 (-0.86-25.6)	1.26 (1.15-1.37)
Saint Kitts and Nevis	0.96 (-0.09-2.65)	16.42 (-1.52-44.95)	4.01 (-0.44-10.3)	21.99 (-2.39-56.65)	0.95 (0.92-0.97)		0.96 (-0.09-2.65)	16.42 (-1.52-44.95)	4.01 (-0.44-10.3)	21.99 (-2.39-56.65)	0.95 (0.92-0.97)
Saint Lucia	3.85 (-0.38-9.93)	16.98 (-1.7-43.68)	12.54 (-1.36-32.61)	22.39 (-2.42-58.42)	0.88 (0.83-0.92)		3.85 (-0.38-9.93)	16.98 (-1.7-43.68)	12.54 (-1.36-32.61)	22.39 (-2.42-58.42)	0.88 (0.83-0.92)
Saint Vincent and the Grenadines	2.15 (-0.18-6.15)	13.29 (-1.1-37.77)	5.94 (-0.56-15.94)	18.84 (-1.78-50.67)	1.19 (1.16-1.22)		2.15 (-0.18-6.15)	13.29 (-1.1-37.77)	5.94 (-0.56-15.94)	18.84 (-1.78-50.67)	1.19 (1.16-1.22)
Samoa	6.73 (-0.81-17.07)	27.28 (-3.29-69.02)	13.09 (-1.78-32.63)	32.31 (-4.41-80.49)	0.45 (0.4-0.5)		6.73 (-0.81-17.07)	27.28 (-3.29-69.02)	13.09 (-1.78-32.63)	32.31 (-4.41-80.49)	0.45 (0.4-0.5)
San Marino	0.86 (-0.08-2.39)	13.84 (-1.22-38.35)	1.83 (-0.16-4.86)	16.74 (-1.43-44.77)	0.63 (0.59-0.66)		0.86 (-0.08-2.39)	13.84 (-1.22-38.35)	1.83 (-0.16-4.86)	16.74 (-1.43-44.77)	0.63 (0.59-0.66)
Sao Tome and Principe	2.05 (-0.18-5.74)	12.61 (-1.14-35.21)	7.37 (-0.72-19.3)	16.29 (-1.59-42.54)	0.84 (0.82-0.86)		2.05 (-0.18-5.74)	12.61 (-1.14-35.21)	7.37 (-0.72-19.3)	16.29 (-1.59-42.54)	0.84 (0.82-0.86)
Saudi Arabia	312.23 (-31.33-831.04)	14.97 (-1.5-39.65)	2376.9 (-294.43-5975.76)	22.3 (-2.76-55.83)	1.3 (1.27-1.33)		312.23 (-31.33-831.04)	14.97 (-1.5-39.65)	2376.9 (-294.43-5975.76)	22.3 (-2.76-55.83)	1.3 (1.27-1.33)
Senegal	138.16 (-11.45-380.63)	12.39 (-1.03-34.03)	410.82 (-39.62-1145.1)	14.35 (-1.39-39.97)	0.4 (0.37-0.42)		138.16 (-11.45-380.63)	12.39 (-1.03-34.03)	410.82 (-39.62-1145.1)	14.35 (-1.39-39.97)	0.4 (0.37-0.42)
Serbia	261.54 (-21.92-715.18)	10.37 (-0.87-28.39)	366.47 (-35.29-975.77)	13.88 (-1.33-37.06)	0.98 (0.95-1)		261.54 (-21.92-715.18)	10.37 (-0.87-28.39)	366.47 (-35.29-975.77)	13.88 (-1.33-37.06)	0.98 (0.95-1)
Seychelles	2.01 (-0.22-5.44)	16.73 (-1.81-45.29)	6.75 (-0.8-17.54)	22.73 (-2.69-59.1)	0.93 (0.9-0.97)		2.01 (-0.22-5.44)	16.73 (-1.81-45.29)	6.75 (-0.8-17.54)	22.73 (-2.69-59.1)	0.93 (0.9-0.97)
Sierra Leone	54.11 (-4.18-160.07)	8.61 (-0.67-25.42)	174.36 (-16.01-491.7)	11.64 (-1.07-32.79)	0.91 (0.84-0.99)		54.11 (-4.18-160.07)	8.61 (-0.67-25.42)	174.36 (-16.01-491.7)	11.64 (-1.07-32.79)	0.91 (0.84-0.99)
Singapore	97.52 (-7.96-288.65)	11.63 (-0.95-34.44)	424.25 (-39.41-1199.36)	21.31 (-1.99-60.48)	1.87 (1.76-1.98)		97.52 (-7.96-288.65)	11.63 (-0.95-34.44)	424.25 (-39.41-1199.36)	21.31 (-1.99-60.48)	1.87 (1.76-1.98)
Slovakia	142.67 (-12.94-392.79)	10.54 (-0.96-28.96)	224.74 (-22.78-583.74)	12.55 (-1.26-32.68)	0.55 (0.53-0.57)		142.67 (-12.94-392.79)	10.54 (-0.96-28.96)	224.74 (-22.78-583.74)	12.55 (-1.26-32.68)	0.55 (0.53-0.57)
Slovenia	54.74 (-5.07-156.83)	10.42 (-0.97-29.86)	80.31 (-7.97-215.56)	13.11 (-1.29-35.3)	0.79 (0.76-0.82)		54.74 (-5.07-156.83)	10.42 (-0.97-29.86)	80.31 (-7.97-215.56)	13.11 (-1.29-35.3)	0.79 (0.76-0.82)
Solomon Islands	9.15 (-0.85-24.73)	19.16 (-1.78-51.73)	35.83 (-3.97-91.46)	24.07 (-2.68-61.36)	0.63 (0.56-0.69)		9.15 (-0.85-24.73)	19.16 (-1.78-51.73)	35.83 (-3.97-91.46)	24.07 (-2.68-61.36)	0.63 (0.56-0.69)
Somalia	108.16 (-8.37-315.72)	8.5 (-0.67-24.82)	386.54 (-31.39-1078.35)	11.18 (-0.91-31.31)	0.96 (0.93-1)		108.16 (-8.37-315.72)	8.5 (-0.67-24.82)	386.54 (-31.39-1078.35)	11.18 (-0.91-31.31)	0.96 (0.93-1)
South Africa	862.56 (-88.94-2253.45)	12.66 (-1.31-32.97)	2313.86 (-275.84-5803.85)	15.49 (-1.85-38.75)	0.64 (0.62-0.66)		862.56 (-88.94-2253.45)	12.66 (-1.31-32.97)	2313.86 (-275.84-5803.85)	15.49 (-1.85-38.75)	0.64 (0.62-0.66)
South Sudan	40.82 (-2.98-121.27)	5.22 (-0.38-15.55)	117.15 (-9.25-335.31)	6.26 (-0.49-17.88)	0.61 (0.59-0.63)		40.82 (-2.98-121.27)	5.22 (-0.38-15.55)	117.15 (-9.25-335.31)	6.26 (-0.49-17.88)	0.61 (0.59-0.63)
Spain	1365.01 (-120.99-3790.95)	14.1 (-1.25-39.16)	2726.19 (-260.95-7442.26)	17.57 (-1.66-48.19)	0.69 (0.66-0.72)		1365.01 (-120.99-3790.95)	14.1 (-1.25-39.16)	2726.19 (-260.95-7442.26)	17.57 (-1.66-48.19)	0.69 (0.66-0.72)
Sri Lanka	326.86 (-27.41-981.82)	8.63 (-0.72-25.87)	860.38 (-74.18-2485.79)	13.48 (-1.16-38.97)	1.39 (1.31-1.47)		326.86 (-27.41-981.82)	8.63 (-0.72-25.87)	860.38 (-74.18-2485.79)	13.48 (-1.16-38.97)	1.39 (1.31-1.47)
Sudan	385.14 (-32.96-1043.43)	11.94 (-1.02-32.27)	1506.93 (-166.57-3901.05)	17.62 (-1.94-45.44)	1.27 (1.23-1.31)		385.14 (-32.96-1043.43)	11.94 (-1.02-32.27)	1506.93 (-166.57-3901.05)	17.62 (-1.94-45.44)	1.27 (1.23-1.31)
Suriname	9.99 (-0.86-28.2)	12.9 (-1.11-36.4)	28.98 (-3.08-75.77)	18.37 (-1.94-48.15)	1.16 (1.13-1.18)		9.99 (-0.86-28.2)	12.9 (-1.11-36.4)	28.98 (-3.08-75.77)	18.37 (-1.94-48.15)	1.16 (1.13-1.18)
Sweden	222.43 (-21.9-626.32)	8.63 (-0.85-24.34)	313.08 (-28.08-848.48)	11.59 (-1.03-31.48)	1.01 (0.95-1.08)		222.43 (-21.9-626.32)	8.63 (-0.85-24.34)	313.08 (-28.08-848.48)	11.59 (-1.03-31.48)	1.01 (0.95-1.08)
Switzerland	224.47 (-17.56-637.07)	10.97 (-0.86-31.18)	348.51 (-32.93-956.14)	13.62 (-1.28-37.41)	0.73 (0.7-0.76)		224.47 (-17.56-637.07)	10.97 (-0.86-31.18)	348.51 (-32.93-956.14)	13.62 (-1.28-37.41)	0.73 (0.7-0.76)
Syrian Arab Republic	241.24 (-23.25-660.9)	14.08 (-1.36-38.49)	855.87 (-105.45-2151.59)	19.75 (-2.43-49.73)	1.11 (1.08-1.14)		241.24 (-23.25-660.9)	14.08 (-1.36-38.49)	855.87 (-105.45-2151.59)	19.75 (-2.43-49.73)	1.11 (1.08-1.14)
Taiwan (Province of China)	582.28 (-46.63-1671.28)	13.47 (-1.08-38.48)	2202.34 (-203.58-6192.87)	27.35 (-2.51-76.92)	2.33 (2.25-2.41)		582.28 (-46.63-1671.28)	13.47 (-1.08-38.48)	2202.34 (-203.58-6192.87)	27.35 (-2.51-76.92)	2.33 (2.25-2.41)
Tajikistan	52.19 (-4.78-145.29)	8.2 (-0.75-22.7)	205.07 (-21.19-556.76)	9.73 (-1.01-26.37)	0.57 (0.56-0.59)		52.19 (-4.78-145.29)	8.2 (-0.75-22.7)	205.07 (-21.19-556.76)	9.73 (-1.01-26.37)	0.57 (0.56-0.59)
Thailand	1282.01 (-113.15-3732.74)	10.2 (-0.9-29.66)	4435.06 (-459.26-11906.77)	19.14 (-1.96-51.52)	2.07 (2-2.14)		1282.01 (-113.15-3732.74)	10.2 (-0.9-29.66)	4435.06 (-459.26-11906.77)	19.14 (-1.96-51.52)	2.07 (2-2.14)
Timor-Leste	5.65 (-0.4-18.09)	4.14 (-0.3-13.22)	18.96 (-1.23-57.19)	7.65 (-0.5-23.07)	2.06 (2-2.12)		5.65 (-0.4-18.09)	4.14 (-0.3-13.22)	18.96 (-1.23-57.19)	7.65 (-0.5-23.07)	2.06 (2-2.12)
Togo	55.37 (-4.78-153.3)	9.94 (-0.87-27.44)	240.58 (-18.84-643.71)	13.52 (-1.06-36.06)	0.99 (0.97-1)		55.37 (-4.78-153.3)	9.94 (-0.87-27.44)	240.58 (-18.84-643.71)	13.52 (-1.06-36.06)	0.99 (0.97-1)
Tokelau	0.07 (-0.01-0.17)	22.32 (-2.45-57.56)	0.1 (-0.01-0.25)	30.17 (-3.83-73.81)	0.92 (0.88-0.96)		0.07 (-0.01-0.17)	22.32 (-2.45-57.56)	0.1 (-0.01-0.25)	30.17 (-3.83-73.81)	0.92 (0.88-0.96)
Tonga	4.78 (-0.65-11.9)	28.13 (-3.83-70.09)	7.81 (-1.09-19.27)	34.13 (-4.77-84.21)	0.5 (0.41-0.58)		4.78 (-0.65-11.9)	28.13 (-3.83-70.09)	7.81 (-1.09-19.27)	34.13 (-4.77-84.21)	0.5 (0.41-0.58)
Trinidad and Tobago	43.61 (-4.12-116.5)	17.56 (-1.67-46.73)	88.47 (-10.36-229.8)	22.14 (-2.6-57.47)	0.77 (0.76-0.79)		43.61 (-4.12-116.5)	17.56 (-1.67-46.73)	88.47 (-10.36-229.8)	22.14 (-2.6-57.47)	0.77 (0.76-0.79)
Tunisia	176.36 (-16.19-477.47)	12.29 (-1.14-33.21)	645.37 (-74.03-1626.11)	17.83 (-2.05-44.92)	1.26 (1.23-1.29)		176.36 (-16.19-477.47)	12.29 (-1.14-33.21)	645.37 (-74.03-1626.11)	17.83 (-2.05-44.92)	1.26 (1.23-1.29)
Turkey	1658.1 (-162.96-4399.26)	15.48 (-1.53-40.94)	5259.53 (-668.61-13350.97)	20.93 (-2.65-53.17)	0.94 (0.92-0.96)		1658.1 (-162.96-4399.26)	15.48 (-1.53-40.94)	5259.53 (-668.61-13350.97)	20.93 (-2.65-53.17)	0.94 (0.92-0.96)
Turkmenistan	43.48 (-3.87-120.66)	8.46 (-0.76-23.33)	128.83 (-13.59-344.28)	10.53 (-1.11-28.15)	0.73 (0.71-0.74)		43.48 (-3.87-120.66)	8.46 (-0.76-23.33)	128.83 (-13.59-344.28)	10.53 (-1.11-28.15)	0.73 (0.71-0.74)
Tuvalu	0.46 (-0.04-1.23)	20.63 (-1.84-54.83)	0.73 (-0.09-1.86)	28.71 (-3.68-73.02)	1.02 (0.99-1.06)		0.46 (-0.04-1.23)	20.63 (-1.84-54.83)	0.73 (-0.09-1.86)	28.71 (-3.68-73.02)	1.02 (0.99-1.06)
Uganda	149.07 (-10.48-461.83)	6.63 (-0.47-20.53)	691.24 (-61.08-1906.22)	10.53 (-0.94-28.93)	1.69 (1.63-1.75)		149.07 (-10.48-461.83)	6.63 (-0.47-20.53)	691.24 (-61.08-1906.22)	10.53 (-0.94-28.93)	1.69 (1.63-1.75)
Ukraine	1384.34 (-125.8-3820.43)	10.19 (-0.92-28.12)	1723.69 (-185.36-4488.28)	12.12 (-1.3-31.61)	0.59 (0.56-0.62)		1384.34 (-125.8-3820.43)	10.19 (-0.92-28.12)	1723.69 (-185.36-4488.28)	12.12 (-1.3-31.61)	0.59 (0.56-0.62)
United Arab Emirates	29.93 (-2.97-82.08)	14.91 (-1.49-40.2)	569.03 (-71.39-1465.92)	22.92 (-2.85-58.58)	1.43 (1.39-1.46)		29.93 (-2.97-82.08)	14.91 (-1.49-40.2)	569.03 (-71.39-1465.92)	22.92 (-2.85-58.58)	1.43 (1.39-1.46)
United Kingdom	2089.8 (-187.55-5645.31)	13.43 (-1.21-36.29)	3184.72 (-316.07-8388.85)	17.13 (-1.69-45.2)	0.82 (0.74-0.9)		2089.8 (-187.55-5645.31)	13.43 (-1.21-36.29)	3184.72 (-316.07-8388.85)	17.13 (-1.69-45.2)	0.82 (0.74-0.9)
United Republic of Tanzania	310.66 (-27.02-912.06)	8.42 (-0.73-24.67)	1380.47 (-116.05-3847.33)	12.7 (-1.07-35.34)	1.45 (1.38-1.53)		310.66 (-27.02-912.06)	8.42 (-0.73-24.67)	1380.47 (-116.05-3847.33)	12.7 (-1.07-35.34)	1.45 (1.38-1.53)
United States of America	13435.8 (-1272.72-36139.25)	19.65 (-1.87-52.8)	21169.71 (-2399.64-53713.81)	24.32 (-2.76-61.8)	1.09 (0.92-1.26)		13435.8 (-1272.72-36139.25)	19.65 (-1.87-52.8)	21169.71 (-2399.64-53713.81)	24.32 (-2.76-61.8)	1.09 (0.92-1.26)
United States Virgin Islands	6.75 (-0.69-17.45)	20.42 (-2.09-52.84)	5.66 (-0.61-14.58)	24.65 (-2.68-63.77)	0.62 (0.6-0.65)		6.75 (-0.69-17.45)	20.42 (-2.09-52.84)	5.66 (-0.61-14.58)	24.65 (-2.68-63.77)	0.62 (0.6-0.65)
Uruguay	115.31 (-10.54-321.58)	15.14 (-1.38-42.26)	187.34 (-18.92-495.33)	19.4 (-1.95-51.33)	0.8 (0.76-0.83)		115.31 (-10.54-321.58)	15.14 (-1.38-42.26)	187.34 (-18.92-495.33)	19.4 (-1.95-51.33)	0.8 (0.76-0.83)
Uzbekistan	245.87 (-25.32-675.12)	8.69 (-0.89-23.74)	1003.03 (-98.49-2726.12)	11.2 (-1.1-30.39)	0.85 (0.83-0.87)		245.87 (-25.32-675.12)	8.69 (-0.89-23.74)	1003.03 (-98.49-2726.12)	11.2 (-1.1-30.39)	0.85 (0.83-0.87)
Vanuatu	4.2 (-0.41-11.29)	17.81 (-1.76-47.6)	15.33 (-1.57-39.18)	23.26 (-2.38-59.38)	0.79 (0.74-0.84)		4.2 (-0.41-11.29)	17.81 (-1.76-47.6)	15.33 (-1.57-39.18)	23.26 (-2.38-59.38)	0.79 (0.74-0.84)
Venezuela (Bolivarian Republic of)	584.72 (-60.48-1596.03)	17.13 (-1.78-46.62)	1728.76 (-192.67-4492.41)	21.54 (-2.4-55.98)	0.74 (0.73-0.76)		584.72 (-60.48-1596.03)	17.13 (-1.78-46.62)	1728.76 (-192.67-4492.41)	21.54 (-2.4-55.98)	0.74 (0.73-0.76)
Viet Nam	333.43 (-24.27-1032.85)	3.21 (-0.23-9.92)	2247.08 (-186.3-6676.66)	7.76 (-0.64-23.05)	3.34 (3.15-3.54)		333.43 (-24.27-1032.85)	3.21 (-0.23-9.92)	2247.08 (-186.3-6676.66)	7.76 (-0.64-23.05)	3.34 (3.15-3.54)
Yemen	155.58 (-11.47-457.82)	8.77 (-0.64-25.72)	773.52 (-67.8-2165.44)	12.38 (-1.1-34.5)	1.16 (1.11-1.21)		155.58 (-11.47-457.82)	8.77 (-0.64-25.72)	773.52 (-67.8-2165.44)	12.38 (-1.1-34.5)	1.16 (1.11-1.21)
Zambia	75.66 (-5.94-221.07)	6.85 (-0.54-19.99)	367.95 (-31.46-990.67)	11.46 (-0.98-30.68)	1.69 (1.67-1.71)		75.66 (-5.94-221.07)	6.85 (-0.54-19.99)	367.95 (-31.46-990.67)	11.46 (-0.98-30.68)	1.69 (1.67-1.71)
Zimbabwe	142.71 (-12.03-400.1)	9.94 (-0.84-27.8)	418.48 (-38.83-1112.63)	13.56 (-1.27-35.94)	0.93 (0.87-0.99)		142.71 (-12.03-400.1)	9.94 (-0.84-27.8)	418.48 (-38.83-1112.63)	13.56 (-1.27-35.94)	0.93 (0.87-0.99)
