# Supplementary material for: Temporal trends and future projections of hip/knee osteoarthritis burden attributable to metabolic risk in women of reproductive age (1990–2021): A multidimensional analysis across 204 countries and territories
Source: Research Square preprint supplement (doi:10.21203/rs.3.rs-6740462/v1), 2025-06-26
Supplement: Supplementary file 2 [file f69254c554e9836b20853e83.xlsx]

## Sheet: Hip....
	DALYs					YLDs
Hip	1990		2021		1990-2021	1990		2021		1990-2021
	Numbe (95% UI)	ASR (95% UI)	Numbe (95% UI)	ASR (95% UI)	EAPC (95% CI)	Numbe (95% UI)	ASR (95% UI)	Numbe (95% UI)	ASR (95% UI)	EAPC (95% CI)
Global	10426.34 (-837.35-29064.81)	0.93 (-0.08-2.6)	28184.59 (-2550.1-77531.33)	1.37 (-0.12-3.77)	1.32 (1.29-1.35)	10426.34 (-837.35-29064.81)	0.93 (-0.08-2.6)	28184.59 (-2550.1-77531.33)	1.37 (-0.12-3.77)	1.32 (1.29-1.35)
Sex
Female	10426.34 (-837.35-29064.81)	0.93 (-0.08-2.6)	28184.59 (-2550.1-77531.33)	1.37 (-0.12-3.77)	1.32 (1.29-1.35)	10426.34 (-837.35-29064.81)	0.93 (-0.08-2.6)	28184.59 (-2550.1-77531.33)	1.37 (-0.12-3.77)	1.32 (1.29-1.35)
Age
30-34 years	1158.59 (-88.66-3499.38)	0.61 (-0.05-1.84)	2852.97 (-250.47-8064.08)	0.95 (-0.08-2.7)	1.62 (1.54-1.71)	1158.59 (-88.66-3499.38)	0.61 (-0.05-1.84)	2852.97 (-250.47-8064.08)	0.95 (-0.08-2.7)	1.62 (1.54-1.71)
35-39 years	1956.63 (-149.85-5358.54)	1.13 (-0.09-3.09)	4923.2 (-414.42-13729)	1.77 (-0.15-4.94)	1.53 (1.45-1.62)	1956.63 (-149.85-5358.54)	1.13 (-0.09-3.09)	4923.2 (-414.42-13729)	1.77 (-0.15-4.94)	1.53 (1.45-1.62)
40-44 years	2962.18 (-232.07-7978.05)	2.11 (-0.17-5.69)	7886.11 (-722.14-21312.58)	3.18 (-0.29-8.59)	1.4 (1.34-1.47)	2962.18 (-232.07-7978.05)	2.11 (-0.17-5.69)	7886.11 (-722.14-21312.58)	3.18 (-0.29-8.59)	1.4 (1.34-1.47)
45-49 years	4348.94 (-366.77-12228.85)	3.82 (-0.32-10.75)	12522.31 (-1163.07-34425.67)	5.31 (-0.49-14.61)	1.12 (1.08-1.16)	4348.94 (-366.77-12228.85)	3.82 (-0.32-10.75)	12522.31 (-1163.07-34425.67)	5.31 (-0.49-14.61)	1.12 (1.08-1.16)
SDI region
High-middle SDI	2372.22 (-194.78-6777.29)	0.97 (-0.08-2.78)	5474.89 (-496.38-15142.61)	1.4 (-0.13-3.86)	1.2 (1.13-1.27)	2372.22 (-194.78-6777.29)	0.97 (-0.08-2.78)	5474.89 (-496.38-15142.61)	1.4 (-0.13-3.86)	1.2 (1.13-1.27)
High SDI	3908.15 (-334.27-10852.95)	1.65 (-0.14-4.57)	6871.54 (-680.03-18830.72)	2.29 (-0.23-6.27)	1.16 (1.1-1.21)	3908.15 (-334.27-10852.95)	1.65 (-0.14-4.57)	6871.54 (-680.03-18830.72)	2.29 (-0.23-6.27)	1.16 (1.1-1.21)
Low-middle SDI	1379.96 (-103.6-3889.75)	0.65 (-0.05-1.83)	5739.26 (-505.83-15867.56)	1.24 (-0.11-3.42)	2.34 (2.24-2.43)	1379.96 (-103.6-3889.75)	0.65 (-0.05-1.83)	5739.26 (-505.83-15867.56)	1.24 (-0.11-3.42)	2.34 (2.24-2.43)
Low SDI	465.14 (-31.34-1330.95)	0.56 (-0.04-1.61)	1851.85 (-140.38-5219.16)	0.89 (-0.07-2.5)	1.61 (1.53-1.69)	465.14 (-31.34-1330.95)	0.56 (-0.04-1.61)	1851.85 (-140.38-5219.16)	0.89 (-0.07-2.5)	1.61 (1.53-1.69)
Middle SDI	2288.36 (-173.11-6380.04)	0.67 (-0.05-1.85)	8223.1 (-718.92-22731.19)	1.19 (-0.1-3.3)	1.98 (1.94-2.01)	2288.36 (-173.11-6380.04)	0.67 (-0.05-1.85)	8223.1 (-718.92-22731.19)	1.19 (-0.1-3.3)	1.98 (1.94-2.01)
GBD region
Advanced Health System	5471.99 (-465.27-15224.33)	1.59 (-0.14-4.42)	9552.18 (-947.9-25901.65)	2.21 (-0.22-6)	1.15 (1.11-1.19)	5471.99 (-465.27-15224.33)	1.59 (-0.14-4.42)	9552.18 (-947.9-25901.65)	2.21 (-0.22-6)	1.15 (1.11-1.19)
Africa	841.92 (-65.04-2357.98)	0.82 (-0.06-2.29)	3253.78 (-304.19-8843.1)	1.2 (-0.11-3.24)	1.19 (1.17-1.22)	841.92 (-65.04-2357.98)	0.82 (-0.06-2.29)	3253.78 (-304.19-8843.1)	1.2 (-0.11-3.24)	1.19 (1.17-1.22)
African Region	621.29 (-43.79-1756.8)	0.77 (-0.05-2.18)	2459.76 (-212.7-6778.37)	1.12 (-0.1-3.08)	1.17 (1.14-1.2)	621.29 (-43.79-1756.8)	0.77 (-0.05-2.18)	2459.76 (-212.7-6778.37)	1.12 (-0.1-3.08)	1.17 (1.14-1.2)
America	2996.54 (-263.89-8337.54)	1.82 (-0.16-5.06)	6202.57 (-626.88-16599.13)	2.21 (-0.22-5.91)	0.73 (0.67-0.8)	2996.54 (-263.89-8337.54)	1.82 (-0.16-5.06)	6202.57 (-626.88-16599.13)	2.21 (-0.22-5.91)	0.73 (0.67-0.8)
Andean Latin America	75.88 (-6.48-207.39)	1.06 (-0.09-2.89)	256.98 (-24.13-690.12)	1.5 (-0.14-4.02)	1.16 (1.14-1.18)	75.88 (-6.48-207.39)	1.06 (-0.09-2.89)	256.98 (-24.13-690.12)	1.5 (-0.14-4.02)	1.16 (1.14-1.18)
Asia	3599.33 (-255.7-10254.08)	0.55 (-0.04-1.58)	13667.86 (-1130.15-38086.45)	1.09 (-0.09-3.04)	2.41 (2.32-2.51)	3599.33 (-255.7-10254.08)	0.55 (-0.04-1.58)	13667.86 (-1130.15-38086.45)	1.09 (-0.09-3.04)	2.41 (2.32-2.51)
Australasia	94.6 (-8.04-280.15)	1.74 (-0.15-5.14)	227.44 (-21.54-653.8)	2.67 (-0.25-7.66)	1.43 (1.33-1.52)	94.6 (-8.04-280.15)	1.74 (-0.15-5.14)	227.44 (-21.54-653.8)	2.67 (-0.25-7.66)	1.43 (1.33-1.52)
Basic Health System	3040.46 (-242.59-8670.65)	0.64 (-0.05-1.83)	10030.51 (-892.67-27390.75)	1.12 (-0.1-3.05)	1.86 (1.8-1.91)	3040.46 (-242.59-8670.65)	0.64 (-0.05-1.83)	10030.51 (-892.67-27390.75)	1.12 (-0.1-3.05)	1.86 (1.8-1.91)
Caribbean	78.77 (-6.03-224.95)	1.04 (-0.08-2.97)	169.15 (-15.45-455.94)	1.36 (-0.12-3.66)	0.99 (0.93-1.04)	78.77 (-6.03-224.95)	1.04 (-0.08-2.97)	169.15 (-15.45-455.94)	1.36 (-0.12-3.66)	0.99 (0.93-1.04)
Central Africa	64.14 (-4.56-188.05)	0.6 (-0.04-1.76)	285.67 (-22.02-810.55)	0.97 (-0.07-2.74)	1.48 (1.42-1.55)	64.14 (-4.56-188.05)	0.6 (-0.04-1.76)	285.67 (-22.02-810.55)	0.97 (-0.07-2.74)	1.48 (1.42-1.55)
Central Asia	153.27 (-13.47-427.01)	1.28 (-0.11-3.53)	411.62 (-39.19-1147.4)	1.63 (-0.16-4.55)	0.84 (0.82-0.86)	153.27 (-13.47-427.01)	1.28 (-0.11-3.53)	411.62 (-39.19-1147.4)	1.63 (-0.16-4.55)	0.84 (0.82-0.86)
Central Europe	416.07 (-33.76-1163.24)	1.28 (-0.1-3.57)	619.56 (-54.17-1707.5)	1.77 (-0.15-4.87)	1.1 (1.06-1.13)	416.07 (-33.76-1163.24)	1.28 (-0.1-3.57)	619.56 (-54.17-1707.5)	1.77 (-0.15-4.87)	1.1 (1.06-1.13)
Central Latin America	357.99 (-32.72-997.35)	1.16 (-0.11-3.23)	1063.28 (-105.11-2885.43)	1.52 (-0.15-4.12)	0.82 (0.78-0.85)	357.99 (-32.72-997.35)	1.16 (-0.11-3.23)	1063.28 (-105.11-2885.43)	1.52 (-0.15-4.12)	0.82 (0.78-0.85)
Central Sub-Saharan Africa	43.24 (-2.9-131.19)	0.49 (-0.03-1.49)	220.97 (-14.98-644.16)	0.9 (-0.06-2.6)	1.87 (1.78-1.96)	43.24 (-2.9-131.19)	0.49 (-0.03-1.49)	220.97 (-14.98-644.16)	0.9 (-0.06-2.6)	1.87 (1.78-1.96)
Commonwealth High Income	516.84 (-43.63-1466.08)	1.72 (-0.14-4.87)	995.22 (-96.64-2778.25)	2.47 (-0.24-6.9)	1.19 (1.12-1.27)	516.84 (-43.63-1466.08)	1.72 (-0.14-4.87)	995.22 (-96.64-2778.25)	2.47 (-0.24-6.9)	1.19 (1.12-1.27)
Commonwealth Low Income	175.39 (-11.38-519.16)	0.55 (-0.04-1.63)	1022.09 (-86.44-2886.1)	1.21 (-0.1-3.4)	2.89 (2.78-2.99)	175.39 (-11.38-519.16)	0.55 (-0.04-1.63)	1022.09 (-86.44-2886.1)	1.21 (-0.1-3.4)	2.89 (2.78-2.99)
Commonwealth Middle Income	1497.93 (-103.96-4332.64)	0.68 (-0.05-1.97)	6542.32 (-549.04-18211.53)	1.3 (-0.11-3.61)	2.39 (2.26-2.51)	1497.93 (-103.96-4332.64)	0.68 (-0.05-1.97)	6542.32 (-549.04-18211.53)	1.3 (-0.11-3.61)	2.39 (2.26-2.51)
East Asia	1113.91 (-79.43-3338.55)	0.42 (-0.03-1.25)	3820.82 (-306.93-10847.98)	0.88 (-0.07-2.5)	2.52 (2.42-2.62)	1113.91 (-79.43-3338.55)	0.42 (-0.03-1.25)	3820.82 (-306.93-10847.98)	0.88 (-0.07-2.5)	2.52 (2.42-2.62)
East Asia & Pacific - WB	2006.37 (-142.27-5937.53)	0.49 (-0.03-1.45)	6179.65 (-488.98-17396.48)	0.9 (-0.07-2.53)	2.07 (1.99-2.15)	2006.37 (-142.27-5937.53)	0.49 (-0.03-1.45)	6179.65 (-488.98-17396.48)	0.9 (-0.07-2.53)	2.07 (1.99-2.15)
Eastern Africa	171.64 (-11.48-492.85)	0.64 (-0.04-1.83)	691.84 (-55.24-1920.74)	0.95 (-0.08-2.63)	1.35 (1.32-1.38)	171.64 (-11.48-492.85)	0.64 (-0.04-1.83)	691.84 (-55.24-1920.74)	0.95 (-0.08-2.63)	1.35 (1.32-1.38)
Eastern Europe	744.63 (-61.61-2076.48)	1.33 (-0.11-3.7)	1150.43 (-113.48-3244.13)	1.77 (-0.17-5)	1.02 (0.99-1.04)	744.63 (-61.61-2076.48)	1.33 (-0.11-3.7)	1150.43 (-113.48-3244.13)	1.77 (-0.17-5)	1.02 (0.99-1.04)
Eastern Mediterranean Region	605.87 (-52.79-1650.77)	0.97 (-0.08-2.63)	2885.56 (-290.08-7733.53)	1.61 (-0.16-4.31)	1.76 (1.72-1.8)	605.87 (-52.79-1650.77)	0.97 (-0.08-2.63)	2885.56 (-290.08-7733.53)	1.61 (-0.16-4.31)	1.76 (1.72-1.8)
Eastern Sub-Saharan Africa	177.64 (-11.61-522.3)	0.61 (-0.04-1.78)	701.98 (-54.57-1969.81)	0.9 (-0.07-2.53)	1.35 (1.32-1.38)	177.64 (-11.61-522.3)	0.61 (-0.04-1.78)	701.98 (-54.57-1969.81)	0.9 (-0.07-2.53)	1.35 (1.32-1.38)
Europe	2959.93 (-249.36-8251.54)	1.46 (-0.12-4.07)	5016.88 (-478.48-13830.75)	2.04 (-0.19-5.61)	1.12 (1.07-1.17)	2959.93 (-249.36-8251.54)	1.46 (-0.12-4.07)	5016.88 (-478.48-13830.75)	2.04 (-0.19-5.61)	1.12 (1.07-1.17)
Europe & Central Asia - WB	3058 (-257.93-8521.97)	1.45 (-0.12-4.05)	5317.1 (-508.46-14674.66)	2 (-0.19-5.53)	1.09 (1.04-1.14)	3058 (-257.93-8521.97)	1.45 (-0.12-4.05)	5317.1 (-508.46-14674.66)	2 (-0.19-5.53)	1.09 (1.04-1.14)
European Region	3083.59 (-260-8591.36)	1.45 (-0.12-4.05)	5384.67 (-514.4-14869.35)	2.01 (-0.19-5.54)	1.09 (1.04-1.14)	3083.59 (-260-8591.36)	1.45 (-0.12-4.05)	5384.67 (-514.4-14869.35)	2.01 (-0.19-5.54)	1.09 (1.04-1.14)
High-income Asia Pacific	368.61 (-26.8-1076)	0.72 (-0.05-2.11)	536.13 (-39.79-1567.09)	0.99 (-0.07-2.9)	1.05 (0.95-1.15)	368.61 (-26.8-1076)	0.72 (-0.05-2.11)	536.13 (-39.79-1567.09)	0.99 (-0.07-2.9)	1.05 (0.95-1.15)
High-income North America	1964.37 (-172.21-5458.1)	2.55 (-0.22-7.08)	3266.45 (-352.92-8736.43)	3.4 (-0.37-9.1)	1.17 (1.05-1.29)	1964.37 (-172.21-5458.1)	2.55 (-0.22-7.08)	3266.45 (-352.92-8736.43)	3.4 (-0.37-9.1)	1.17 (1.05-1.29)
Latin America & Caribbean - WB	1047.5 (-93.12-2924.1)	1.18 (-0.1-3.28)	2954.36 (-275.66-8015.95)	1.59 (-0.15-4.31)	0.98 (0.97-1)	1047.5 (-93.12-2924.1)	1.18 (-0.1-3.28)	2954.36 (-275.66-8015.95)	1.59 (-0.15-4.31)	0.98 (0.97-1)
Limited Health System	1774.76 (-122.09-5127.61)	0.63 (-0.04-1.83)	8100.91 (-668.65-22454.25)	1.22 (-0.1-3.37)	2.41 (2.3-2.53)	1774.76 (-122.09-5127.61)	0.63 (-0.04-1.83)	8100.91 (-668.65-22454.25)	1.22 (-0.1-3.37)	2.41 (2.3-2.53)
Middle East & North Africa - WB	423.71 (-38.5-1166.9)	0.99 (-0.09-2.72)	1932.58 (-210.92-5008.06)	1.55 (-0.17-4.01)	1.43 (1.4-1.45)	423.71 (-38.5-1166.9)	0.99 (-0.09-2.72)	1932.58 (-210.92-5008.06)	1.55 (-0.17-4.01)	1.43 (1.4-1.45)
Minimal Health System	126.61 (-8.28-368.87)	0.56 (-0.04-1.64)	477.04 (-35.06-1339.41)	0.84 (-0.06-2.35)	1.3 (1.22-1.37)	126.61 (-8.28-368.87)	0.56 (-0.04-1.64)	477.04 (-35.06-1339.41)	0.84 (-0.06-2.35)	1.3 (1.22-1.37)
North Africa and Middle East	559.99 (-50.01-1546.81)	0.97 (-0.09-2.67)	2429.7 (-261.88-6356.2)	1.51 (-0.16-3.95)	1.42 (1.4-1.45)	559.99 (-50.01-1546.81)	0.97 (-0.09-2.67)	2429.7 (-261.88-6356.2)	1.51 (-0.16-3.95)	1.42 (1.4-1.45)
North America	1964.4 (-172.21-5458.14)	2.55 (-0.22-7.08)	3266.47 (-352.92-8736.5)	3.4 (-0.37-9.1)	1.17 (1.05-1.29)	1964.4 (-172.21-5458.14)	2.55 (-0.22-7.08)	3266.47 (-352.92-8736.5)	3.4 (-0.37-9.1)	1.17 (1.05-1.29)
Northern Africa	221.69 (-20.72-610.52)	1.02 (-0.1-2.8)	826.21 (-95.19-2190.8)	1.58 (-0.18-4.18)	1.39 (1.38-1.41)	221.69 (-20.72-610.52)	1.02 (-0.1-2.8)	826.21 (-95.19-2190.8)	1.58 (-0.18-4.18)	1.39 (1.38-1.41)
Oceania	10.78 (-0.93-31.38)	0.92 (-0.08-2.69)	33.12 (-2.75-97.38)	1.07 (-0.09-3.14)	0.38 (0.28-0.48)	10.78 (-0.93-31.38)	0.92 (-0.08-2.69)	33.12 (-2.75-97.38)	1.07 (-0.09-3.14)	0.38 (0.28-0.48)
Region of the Americas	2996.54 (-263.89-8337.54)	1.82 (-0.16-5.06)	6202.57 (-626.88-16599.13)	2.21 (-0.22-5.91)	0.73 (0.67-0.8)	2996.54 (-263.89-8337.54)	1.82 (-0.16-5.06)	6202.57 (-626.88-16599.13)	2.21 (-0.22-5.91)	0.73 (0.67-0.8)
South-East Asia Region	1386.54 (-91.68-4033.75)	0.55 (-0.04-1.6)	6115.92 (-488.38-16834.8)	1.13 (-0.09-3.11)	2.69 (2.55-2.84)	1386.54 (-91.68-4033.75)	0.55 (-0.04-1.6)	6115.92 (-488.38-16834.8)	1.13 (-0.09-3.11)	2.69 (2.55-2.84)
South Asia	1250.13 (-85.51-3670.76)	0.61 (-0.04-1.81)	5960.57 (-479.72-16714.85)	1.29 (-0.1-3.63)	2.83 (2.67-3)	1250.13 (-85.51-3670.76)	0.61 (-0.04-1.81)	5960.57 (-479.72-16714.85)	1.29 (-0.1-3.63)	2.83 (2.67-3)
South Asia - WB	1283.26 (-87.49-3751.29)	0.61 (-0.04-1.79)	6059.87 (-487.74-16996.58)	1.28 (-0.1-3.6)	2.8 (2.64-2.97)	1283.26 (-87.49-3751.29)	0.61 (-0.04-1.79)	6059.87 (-487.74-16996.58)	1.28 (-0.1-3.6)	2.8 (2.64-2.97)
Southeast Asia	439.58 (-28.69-1291.64)	0.48 (-0.03-1.4)	1610.01 (-118.93-4455.84)	0.83 (-0.06-2.29)	1.91 (1.83-1.98)	439.58 (-28.69-1291.64)	0.48 (-0.03-1.4)	1610.01 (-118.93-4455.84)	0.83 (-0.06-2.29)	1.91 (1.83-1.98)
Southern Africa	167.45 (-12.67-478.68)	1.02 (-0.08-2.91)	520.19 (-50.36-1440.33)	1.35 (-0.13-3.74)	0.88 (0.83-0.93)	167.45 (-12.67-478.68)	1.02 (-0.08-2.91)	520.19 (-50.36-1440.33)	1.35 (-0.13-3.74)	0.88 (0.83-0.93)
Southern Latin America	187.45 (-17.76-539.16)	1.6 (-0.15-4.59)	452.41 (-42.58-1234.12)	2.38 (-0.22-6.49)	1.33 (1.23-1.43)	187.45 (-17.76-539.16)	1.6 (-0.15-4.59)	452.41 (-42.58-1234.12)	2.38 (-0.22-6.49)	1.33 (1.23-1.43)
Southern Sub-Saharan Africa	127.26 (-10.16-355.24)	1.32 (-0.11-3.68)	340.85 (-36.53-916.77)	1.66 (-0.18-4.46)	0.76 (0.72-0.79)	127.26 (-10.16-355.24)	1.32 (-0.11-3.68)	340.85 (-36.53-916.77)	1.66 (-0.18-4.46)	0.76 (0.72-0.79)
Sub-Saharan Africa - WB	624.13 (-44.34-1760.96)	0.77 (-0.05-2.16)	2438.92 (-209.49-6776.44)	1.11 (-0.1-3.07)	1.15 (1.12-1.18)	624.13 (-44.34-1760.96)	0.77 (-0.05-2.16)	2438.92 (-209.49-6776.44)	1.11 (-0.1-3.07)	1.15 (1.12-1.18)
Tropical Latin America	350.35 (-29.29-994.97)	1.09 (-0.09-3.08)	1018.62 (-92.86-2805.01)	1.51 (-0.14-4.16)	1.09 (1.07-1.11)	350.35 (-29.29-994.97)	1.09 (-0.09-3.08)	1018.62 (-92.86-2805.01)	1.51 (-0.14-4.16)	1.09 (1.07-1.11)
Western Africa	217.01 (-15.86-615.04)	0.81 (-0.06-2.29)	929.86 (-80.15-2631.13)	1.18 (-0.1-3.34)	1.15 (1.09-1.21)	217.01 (-15.86-615.04)	0.81 (-0.06-2.29)	929.86 (-80.15-2631.13)	1.18 (-0.1-3.34)	1.15 (1.09-1.21)
Western Europe	1663.73 (-139.24-4637.24)	1.64 (-0.14-4.57)	2840.15 (-258.42-7956.52)	2.36 (-0.22-6.61)	1.17 (1.09-1.26)	1663.73 (-139.24-4637.24)	1.64 (-0.14-4.57)	2840.15 (-258.42-7956.52)	2.36 (-0.22-6.61)	1.17 (1.09-1.26)
Western Pacific Region	1680.89 (-121.74-4973.61)	0.49 (-0.04-1.46)	5017.89 (-402.11-14122.69)	0.9 (-0.07-2.55)	2.06 (1.95-2.18)	1680.89 (-121.74-4973.61)	0.49 (-0.04-1.46)	5017.89 (-402.11-14122.69)	0.9 (-0.07-2.55)	2.06 (1.95-2.18)
Western Sub-Saharan Africa	248.09 (-18.25-705.67)	0.83 (-0.06-2.36)	1054.35 (-91.39-2978.03)	1.2 (-0.1-3.38)	1.11 (1.06-1.16)	248.09 (-18.25-705.67)	0.83 (-0.06-2.36)	1054.35 (-91.39-2978.03)	1.2 (-0.1-3.38)	1.11 (1.06-1.16)
Country
Afghanistan	11.98 (-0.87-36.6)	0.65 (-0.05-2.01)	47.06 (-3.46-135.38)	0.89 (-0.07-2.53)	1.13 (1-1.25)	11.98 (-0.87-36.6)	0.65 (-0.05-2.01)	47.06 (-3.46-135.38)	0.89 (-0.07-2.53)	1.13 (1-1.25)
Albania	6.83 (-0.59-20.44)	1.11 (-0.1-3.32)	10.76 (-1.05-30.23)	1.57 (-0.15-4.43)	1.2 (1.17-1.22)	6.83 (-0.59-20.44)	1.11 (-0.1-3.32)	10.76 (-1.05-30.23)	1.57 (-0.15-4.43)	1.2 (1.17-1.22)
Algeria	33.58 (-2.55-99.08)	0.86 (-0.07-2.55)	175.52 (-16.87-484.31)	1.45 (-0.14-3.99)	1.73 (1.67-1.78)	33.58 (-2.55-99.08)	0.86 (-0.07-2.55)	175.52 (-16.87-484.31)	1.45 (-0.14-3.99)	1.73 (1.67-1.78)
American Samoa	0.17 (-0.02-0.47)	1.95 (-0.24-5.37)	0.29 (-0.04-0.78)	2.27 (-0.28-6.16)	0.32 (0.18-0.47)	0.17 (-0.02-0.47)	1.95 (-0.24-5.37)	0.29 (-0.04-0.78)	2.27 (-0.28-6.16)	0.32 (0.18-0.47)
Andorra	0.24 (-0.02-0.72)	1.64 (-0.14-4.93)	0.7 (-0.06-2.01)	2.3 (-0.21-6.64)	1.08 (1.03-1.14)	0.24 (-0.02-0.72)	1.64 (-0.14-4.93)	0.7 (-0.06-2.01)	2.3 (-0.21-6.64)	1.08 (1.03-1.14)
Angola	9.13 (-0.67-28.89)	0.55 (-0.04-1.74)	56.63 (-3.86-179.95)	0.97 (-0.07-3.08)	1.83 (1.74-1.93)	9.13 (-0.67-28.89)	0.55 (-0.04-1.74)	56.63 (-3.86-179.95)	0.97 (-0.07-3.08)	1.83 (1.74-1.93)
Antigua and Barbuda	0.14 (-0.01-0.42)	1.08 (-0.11-3.08)	0.41 (-0.04-1.21)	1.45 (-0.13-4.29)	0.98 (0.95-1.01)	0.14 (-0.01-0.42)	1.08 (-0.11-3.08)	0.41 (-0.04-1.21)	1.45 (-0.13-4.29)	0.98 (0.95-1.01)
Argentina	120.79 (-11.87-353.17)	1.53 (-0.15-4.49)	295.86 (-26.09-811.34)	2.31 (-0.2-6.33)	1.36 (1.27-1.46)	120.79 (-11.87-353.17)	1.53 (-0.15-4.49)	295.86 (-26.09-811.34)	2.31 (-0.2-6.33)	1.36 (1.27-1.46)
Armenia	8.57 (-0.77-25.59)	1.28 (-0.12-3.77)	14.41 (-1.48-41.19)	1.67 (-0.17-4.76)	0.91 (0.86-0.97)	8.57 (-0.77-25.59)	1.28 (-0.12-3.77)	14.41 (-1.48-41.19)	1.67 (-0.17-4.76)	0.91 (0.86-0.97)
Australia	78.67 (-6.56-230.1)	1.73 (-0.14-5.04)	192.39 (-18.06-555.85)	2.68 (-0.25-7.74)	1.46 (1.36-1.56)	78.67 (-6.56-230.1)	1.73 (-0.14-5.04)	192.39 (-18.06-555.85)	2.68 (-0.25-7.74)	1.46 (1.36-1.56)
Austria	30.62 (-2.55-90.94)	1.43 (-0.12-4.25)	51.85 (-3.81-155.07)	2.06 (-0.15-6.2)	1.11 (1.07-1.14)	30.62 (-2.55-90.94)	1.43 (-0.12-4.25)	51.85 (-3.81-155.07)	2.06 (-0.15-6.2)	1.11 (1.07-1.14)
Azerbaijan	16.98 (-1.32-49.07)	1.35 (-0.11-3.84)	53.78 (-5-151.11)	1.82 (-0.17-5.08)	1.11 (1.05-1.16)	16.98 (-1.32-49.07)	1.35 (-0.11-3.84)	53.78 (-5-151.11)	1.82 (-0.17-5.08)	1.11 (1.05-1.16)
Bahamas	0.75 (-0.06-2.17)	1.31 (-0.11-3.77)	1.92 (-0.18-5.41)	1.62 (-0.15-4.59)	0.73 (0.7-0.76)	0.75 (-0.06-2.17)	1.31 (-0.11-3.77)	1.92 (-0.18-5.41)	1.62 (-0.15-4.59)	0.73 (0.7-0.76)
Bahrain	0.97 (-0.07-2.75)	1.21 (-0.09-3.41)	6.38 (-0.74-17.49)	1.84 (-0.22-5.05)	1.41 (1.37-1.46)	0.97 (-0.07-2.75)	1.21 (-0.09-3.41)	6.38 (-0.74-17.49)	1.84 (-0.22-5.05)	1.41 (1.37-1.46)
Bangladesh	68.57 (-4.45-218.97)	0.42 (-0.03-1.32)	557.45 (-44.38-1624.84)	1.29 (-0.1-3.76)	4.35 (4.16-4.53)	68.57 (-4.45-218.97)	0.42 (-0.03-1.32)	557.45 (-44.38-1624.84)	1.29 (-0.1-3.76)	4.35 (4.16-4.53)
Barbados	0.81 (-0.08-2.32)	1.33 (-0.13-3.79)	1.49 (-0.16-4.32)	1.71 (-0.18-4.95)	0.73 (0.68-0.77)	0.81 (-0.08-2.32)	1.33 (-0.13-3.79)	1.49 (-0.16-4.32)	1.71 (-0.18-4.95)	0.73 (0.68-0.77)
Belarus	28.94 (-2.37-85.24)	1.17 (-0.1-3.43)	47.27 (-4.45-135.84)	1.66 (-0.16-4.76)	1.22 (1.19-1.25)	28.94 (-2.37-85.24)	1.17 (-0.1-3.43)	47.27 (-4.45-135.84)	1.66 (-0.16-4.76)	1.22 (1.19-1.25)
Belgium	38.06 (-2.98-110.72)	1.5 (-0.12-4.34)	68.16 (-6.01-199.7)	2.23 (-0.2-6.56)	1.23 (1.13-1.32)	38.06 (-2.98-110.72)	1.5 (-0.12-4.34)	68.16 (-6.01-199.7)	2.23 (-0.2-6.56)	1.23 (1.13-1.32)
Belize	0.36 (-0.03-1.05)	1.33 (-0.12-3.86)	1.9 (-0.2-5.31)	1.77 (-0.19-4.94)	0.89 (0.77-1.01)	0.36 (-0.03-1.05)	1.33 (-0.12-3.86)	1.9 (-0.2-5.31)	1.77 (-0.19-4.94)	0.89 (0.77-1.01)
Benin	7.79 (-0.58-22.92)	1.03 (-0.08-3.01)	30.85 (-2.39-90.46)	1.31 (-0.1-3.87)	0.82 (0.76-0.89)	7.79 (-0.58-22.92)	1.03 (-0.08-3.01)	30.85 (-2.39-90.46)	1.31 (-0.1-3.87)	0.82 (0.76-0.89)
Bermuda	0.27 (-0.02-0.78)	1.47 (-0.13-4.29)	0.34 (-0.03-0.97)	1.82 (-0.18-5.23)	0.72 (0.68-0.76)	0.27 (-0.02-0.78)	1.47 (-0.13-4.29)	0.34 (-0.03-0.97)	1.82 (-0.18-5.23)	0.72 (0.68-0.76)
Bhutan	1.2 (-0.09-3.38)	1.27 (-0.1-3.56)	3.99 (-0.35-11.39)	2.1 (-0.19-6)	1.77 (1.7-1.84)	1.2 (-0.09-3.38)	1.27 (-0.1-3.56)	3.99 (-0.35-11.39)	2.1 (-0.19-6)	1.77 (1.7-1.84)
Bolivia (Plurinational State of)	10.78 (-0.94-31.53)	0.9 (-0.08-2.63)	38.4 (-3.5-108.06)	1.32 (-0.12-3.71)	1.31 (1.26-1.37)	10.78 (-0.94-31.53)	0.9 (-0.08-2.63)	38.4 (-3.5-108.06)	1.32 (-0.12-3.71)	1.31 (1.26-1.37)
Bosnia and Herzegovina	12.4 (-1.04-36.84)	1.14 (-0.1-3.37)	15.49 (-1.34-43.38)	1.62 (-0.14-4.55)	1.17 (1.06-1.28)	12.4 (-1.04-36.84)	1.14 (-0.1-3.37)	15.49 (-1.34-43.38)	1.62 (-0.14-4.55)	1.17 (1.06-1.28)
Botswana	2.13 (-0.13-6.38)	1 (-0.06-2.96)	10.33 (-0.88-29.79)	1.6 (-0.14-4.61)	1.45 (1.38-1.52)	2.13 (-0.13-6.38)	1 (-0.06-2.96)	10.33 (-0.88-29.79)	1.6 (-0.14-4.61)	1.45 (1.38-1.52)
Brazil	342.98 (-28.53-973.36)	1.09 (-0.09-3.08)	995.18 (-90.84-2747.22)	1.51 (-0.14-4.18)	1.1 (1.08-1.12)	342.98 (-28.53-973.36)	1.09 (-0.09-3.08)	995.18 (-90.84-2747.22)	1.51 (-0.14-4.18)	1.1 (1.08-1.12)
Brunei Darussalam	0.44 (-0.03-1.38)	0.91 (-0.07-2.8)	2.16 (-0.17-6.3)	1.61 (-0.13-4.7)	1.97 (1.78-2.16)	0.44 (-0.03-1.38)	0.91 (-0.07-2.8)	2.16 (-0.17-6.3)	1.61 (-0.13-4.7)	1.97 (1.78-2.16)
Bulgaria	34.66 (-2.7-102.51)	1.44 (-0.11-4.25)	34.83 (-3.05-102.1)	1.71 (-0.15-5.02)	0.57 (0.53-0.61)	34.66 (-2.7-102.51)	1.44 (-0.11-4.25)	34.83 (-3.05-102.1)	1.71 (-0.15-5.02)	0.57 (0.53-0.61)
Burkina Faso	8.79 (-0.65-26.99)	0.56 (-0.04-1.71)	28.71 (-2.43-92.04)	0.74 (-0.06-2.37)	0.99 (0.93-1.05)	8.79 (-0.65-26.99)	0.56 (-0.04-1.71)	28.71 (-2.43-92.04)	0.74 (-0.06-2.37)	0.99 (0.93-1.05)
Burundi	3.17 (-0.23-10.49)	0.36 (-0.03-1.19)	10.55 (-0.65-35.95)	0.48 (-0.03-1.66)	0.8 (0.72-0.88)	3.17 (-0.23-10.49)	0.36 (-0.03-1.19)	10.55 (-0.65-35.95)	0.48 (-0.03-1.66)	0.8 (0.72-0.88)
Cabo Verde	0.45 (-0.04-1.41)	0.92 (-0.08-2.85)	1.97 (-0.16-5.94)	1.46 (-0.12-4.39)	1.57 (1.53-1.6)	0.45 (-0.04-1.41)	0.92 (-0.08-2.85)	1.97 (-0.16-5.94)	1.46 (-0.12-4.39)	1.57 (1.53-1.6)
Cambodia	6.03 (-0.4-18.86)	0.32 (-0.02-1.01)	20.26 (-1.32-63.73)	0.49 (-0.03-1.54)	1.48 (1.41-1.55)	6.03 (-0.4-18.86)	0.32 (-0.02-1.01)	20.26 (-1.32-63.73)	0.49 (-0.03-1.54)	1.48 (1.41-1.55)
Cameroon	21.84 (-1.8-64.63)	1.31 (-0.11-3.85)	93.75 (-8.34-269.19)	1.62 (-0.15-4.67)	0.63 (0.6-0.66)	21.84 (-1.8-64.63)	1.31 (-0.11-3.85)	93.75 (-8.34-269.19)	1.62 (-0.15-4.67)	0.63 (0.6-0.66)
Canada	103.16 (-9.32-301.77)	1.34 (-0.12-3.9)	200.44 (-20.62-572.18)	1.99 (-0.2-5.67)	1.22 (1.12-1.33)	103.16 (-9.32-301.77)	1.34 (-0.12-3.9)	200.44 (-20.62-572.18)	1.99 (-0.2-5.67)	1.22 (1.12-1.33)
Central African Republic	2.53 (-0.17-7.86)	0.54 (-0.04-1.68)	8.99 (-0.62-28.15)	0.85 (-0.06-2.64)	1.44 (1.38-1.5)	2.53 (-0.17-7.86)	0.54 (-0.04-1.68)	8.99 (-0.62-28.15)	0.85 (-0.06-2.64)	1.44 (1.38-1.5)
Chad	4.84 (-0.38-15.09)	0.5 (-0.04-1.55)	16.32 (-1.08-52.89)	0.63 (-0.04-2.03)	0.66 (0.6-0.73)	4.84 (-0.38-15.09)	0.5 (-0.04-1.55)	16.32 (-1.08-52.89)	0.63 (-0.04-2.03)	0.66 (0.6-0.73)
Chile	55.38 (-5.04-157.03)	1.78 (-0.16-5.04)	136.2 (-14.28-384.47)	2.59 (-0.27-7.32)	1.24 (1.16-1.33)	55.38 (-5.04-157.03)	1.78 (-0.16-5.04)	136.2 (-14.28-384.47)	2.59 (-0.27-7.32)	1.24 (1.16-1.33)
China	1077.51 (-76.86-3232.87)	0.42 (-0.03-1.26)	3721.24 (-299.69-10576.52)	0.89 (-0.07-2.52)	2.54 (2.43-2.65)	1077.51 (-76.86-3232.87)	0.42 (-0.03-1.26)	3721.24 (-299.69-10576.52)	0.89 (-0.07-2.52)	2.54 (2.43-2.65)
Colombia	58.95 (-5.08-170.33)	0.9 (-0.08-2.58)	175.04 (-17.83-507.39)	1.32 (-0.13-3.82)	1.29 (1.26-1.32)	58.95 (-5.08-170.33)	0.9 (-0.08-2.58)	175.04 (-17.83-507.39)	1.32 (-0.13-3.82)	1.29 (1.26-1.32)
Comoros	0.52 (-0.04-1.59)	0.7 (-0.06-2.13)	1.94 (-0.14-5.72)	1.11 (-0.08-3.27)	1.5 (1.46-1.54)	0.52 (-0.04-1.59)	0.7 (-0.06-2.13)	1.94 (-0.14-5.72)	1.11 (-0.08-3.27)	1.5 (1.46-1.54)
Congo	3.18 (-0.19-9.76)	0.84 (-0.05-2.58)	18.09 (-1.45-54.54)	1.41 (-0.11-4.25)	1.65 (1.58-1.73)	3.18 (-0.19-9.76)	0.84 (-0.05-2.58)	18.09 (-1.45-54.54)	1.41 (-0.11-4.25)	1.65 (1.58-1.73)
Cook Islands	0.07 (-0.01-0.19)	1.8 (-0.19-5.06)	0.1 (-0.01-0.28)	2.24 (-0.29-5.93)	0.64 (0.55-0.73)	0.07 (-0.01-0.19)	1.8 (-0.19-5.06)	0.1 (-0.01-0.28)	2.24 (-0.29-5.93)	0.64 (0.55-0.73)
Costa Rica	6.31 (-0.57-19.36)	1.06 (-0.1-3.24)	19.43 (-2.04-55.66)	1.43 (-0.15-4.1)	0.96 (0.93-0.99)	6.31 (-0.57-19.36)	1.06 (-0.1-3.24)	19.43 (-2.04-55.66)	1.43 (-0.15-4.1)	0.96 (0.93-0.99)
C么te d'Ivoire	17.87 (-1.51-54.59)	1.01 (-0.09-3.05)	66.56 (-6.03-189.37)	1.3 (-0.12-3.67)	0.86 (0.83-0.89)	17.87 (-1.51-54.59)	1.01 (-0.09-3.05)	66.56 (-6.03-189.37)	1.3 (-0.12-3.67)	0.86 (0.83-0.89)
Croatia	15.97 (-1.43-48.58)	1.21 (-0.11-3.69)	20.39 (-1.77-59.87)	1.74 (-0.15-5.13)	1.32 (1.25-1.39)	15.97 (-1.43-48.58)	1.21 (-0.11-3.69)	20.39 (-1.77-59.87)	1.74 (-0.15-5.13)	1.32 (1.25-1.39)
Cuba	28.53 (-2.03-87.12)	1.06 (-0.08-3.25)	47.15 (-4.3-126.33)	1.5 (-0.13-4.06)	1.23 (1.18-1.28)	28.53 (-2.03-87.12)	1.06 (-0.08-3.25)	47.15 (-4.3-126.33)	1.5 (-0.13-4.06)	1.23 (1.18-1.28)
Cyprus	2.56 (-0.19-7.74)	1.26 (-0.09-3.82)	10.08 (-0.84-29.77)	2.19 (-0.18-6.47)	1.82 (1.7-1.93)	2.56 (-0.19-7.74)	1.26 (-0.09-3.82)	10.08 (-0.84-29.77)	2.19 (-0.18-6.47)	1.82 (1.7-1.93)
Czechia	40.73 (-3.46-118.61)	1.34 (-0.11-3.91)	58.62 (-5.47-166.03)	1.72 (-0.16-4.9)	0.81 (0.79-0.83)	40.73 (-3.46-118.61)	1.34 (-0.11-3.91)	58.62 (-5.47-166.03)	1.72 (-0.16-4.9)	0.81 (0.79-0.83)
Democratic People's Republic of Korea	13.58 (-0.95-41.79)	0.26 (-0.02-0.8)	25.13 (-1.54-78.03)	0.33 (-0.02-1.04)	0.75 (0.64-0.86)	13.58 (-0.95-41.79)	0.26 (-0.02-0.8)	25.13 (-1.54-78.03)	0.33 (-0.02-1.04)	0.75 (0.64-0.86)
Democratic Republic of the Congo	25.94 (-1.6-83.35)	0.43 (-0.03-1.37)	125.36 (-7.78-380.83)	0.79 (-0.05-2.39)	1.85 (1.72-1.98)	25.94 (-1.6-83.35)	0.43 (-0.03-1.37)	125.36 (-7.78-380.83)	0.79 (-0.05-2.39)	1.85 (1.72-1.98)
Denmark	29.4 (-2.16-87.49)	1.94 (-0.14-5.77)	36.67 (-3.12-108.18)	2.41 (-0.2-7.12)	0.66 (0.54-0.79)	29.4 (-2.16-87.49)	1.94 (-0.14-5.77)	36.67 (-3.12-108.18)	2.41 (-0.2-7.12)	0.66 (0.54-0.79)
Djibouti	0.32 (-0.02-0.95)	0.47 (-0.03-1.41)	2.34 (-0.15-6.83)	0.76 (-0.05-2.2)	1.57 (1.54-1.61)	0.32 (-0.02-0.95)	0.47 (-0.03-1.41)	2.34 (-0.15-6.83)	0.76 (-0.05-2.2)	1.57 (1.54-1.61)
Dominica	0.17 (-0.02-0.48)	1.26 (-0.12-3.62)	0.27 (-0.03-0.75)	1.61 (-0.17-4.49)	0.82 (0.78-0.87)	0.17 (-0.02-0.48)	1.26 (-0.12-3.62)	0.27 (-0.03-0.75)	1.61 (-0.17-4.49)	0.82 (0.78-0.87)
Dominican Republic	12.31 (-0.89-37.95)	0.94 (-0.07-2.89)	39.39 (-3.89-112.47)	1.42 (-0.14-4.06)	1.52 (1.47-1.57)	12.31 (-0.89-37.95)	0.94 (-0.07-2.89)	39.39 (-3.89-112.47)	1.42 (-0.14-4.06)	1.52 (1.47-1.57)
Ecuador	24.17 (-1.92-65.8)	1.29 (-0.1-3.5)	79.13 (-8.14-219.19)	1.74 (-0.18-4.82)	0.97 (0.93-1.01)	24.17 (-1.92-65.8)	1.29 (-0.1-3.5)	79.13 (-8.14-219.19)	1.74 (-0.18-4.82)	0.97 (0.93-1.01)
Egypt	123.5 (-12.91-346.96)	1.16 (-0.12-3.24)	418.13 (-47.73-1167.77)	1.78 (-0.21-4.94)	1.33 (1.28-1.37)	123.5 (-12.91-346.96)	1.16 (-0.12-3.24)	418.13 (-47.73-1167.77)	1.78 (-0.21-4.94)	1.33 (1.28-1.37)
El Salvador	10.59 (-0.97-30.13)	1.1 (-0.1-3.13)	25.54 (-2.45-73.03)	1.48 (-0.14-4.24)	0.98 (0.91-1.04)	10.59 (-0.97-30.13)	1.1 (-0.1-3.13)	25.54 (-2.45-73.03)	1.48 (-0.14-4.24)	0.98 (0.91-1.04)
Equatorial Guinea	0.59 (-0.04-1.78)	0.78 (-0.06-2.35)	4.29 (-0.37-12.27)	1.55 (-0.14-4.42)	2.48 (2.38-2.58)	0.59 (-0.04-1.78)	0.78 (-0.06-2.35)	4.29 (-0.37-12.27)	1.55 (-0.14-4.42)	2.48 (2.38-2.58)
Eritrea	1.83 (-0.12-5.82)	0.32 (-0.02-1.01)	6.24 (-0.45-19.99)	0.46 (-0.03-1.48)	1.15 (1.06-1.24)	1.83 (-0.12-5.82)	0.32 (-0.02-1.01)	6.24 (-0.45-19.99)	0.46 (-0.03-1.48)	1.15 (1.06-1.24)
Estonia	5.83 (-0.47-17.28)	1.38 (-0.11-4.09)	6.3 (-0.52-19.18)	1.72 (-0.14-5.26)	0.89 (0.84-0.95)	5.83 (-0.47-17.28)	1.38 (-0.11-4.09)	6.3 (-0.52-19.18)	1.72 (-0.14-5.26)	0.89 (0.84-0.95)
Eswatini	1.97 (-0.19-5.75)	1.5 (-0.15-4.37)	4.79 (-0.46-13.02)	1.94 (-0.19-5.27)	0.69 (0.56-0.83)	1.97 (-0.19-5.75)	1.5 (-0.15-4.37)	4.79 (-0.46-13.02)	1.94 (-0.19-5.27)	0.69 (0.56-0.83)
Ethiopia	40.74 (-2.79-122.55)	0.52 (-0.04-1.54)	113.35 (-7.58-329.3)	0.58 (-0.04-1.68)	0.29 (0.25-0.33)	40.74 (-2.79-122.55)	0.52 (-0.04-1.54)	113.35 (-7.58-329.3)	0.58 (-0.04-1.68)	0.29 (0.25-0.33)
Fiji	2.17 (-0.17-6.56)	1.35 (-0.1-4.06)	4.1 (-0.44-11.24)	1.8 (-0.19-4.92)	0.89 (0.82-0.96)	2.17 (-0.17-6.56)	1.35 (-0.1-4.06)	4.1 (-0.44-11.24)	1.8 (-0.19-4.92)	0.89 (0.82-0.96)
Finland	25.73 (-2.07-77.79)	1.71 (-0.14-5.17)	32.77 (-2.9-93.56)	2.42 (-0.21-6.91)	1.12 (1.04-1.21)	25.73 (-2.07-77.79)	1.71 (-0.14-5.17)	32.77 (-2.9-93.56)	2.42 (-0.21-6.91)	1.12 (1.04-1.21)
France	196.16 (-17.33-570.74)	1.34 (-0.12-3.88)	405.52 (-32.9-1154.41)	2.31 (-0.19-6.6)	1.85 (1.59-2.12)	196.16 (-17.33-570.74)	1.34 (-0.12-3.88)	405.52 (-32.9-1154.41)	2.31 (-0.19-6.6)	1.85 (1.59-2.12)
Gabon	1.87 (-0.15-5.62)	1.27 (-0.1-3.79)	7.62 (-0.78-22.01)	1.91 (-0.19-5.5)	1.31 (1.27-1.36)	1.87 (-0.15-5.62)	1.27 (-0.1-3.79)	7.62 (-0.78-22.01)	1.91 (-0.19-5.5)	1.31 (1.27-1.36)
Gambia	1.3 (-0.1-3.91)	0.92 (-0.07-2.77)	5.57 (-0.46-16.68)	1.29 (-0.11-3.86)	1.1 (1.06-1.14)	1.3 (-0.1-3.91)	0.92 (-0.07-2.77)	5.57 (-0.46-16.68)	1.29 (-0.11-3.86)	1.1 (1.06-1.14)
Georgia	18.09 (-1.6-52.77)	1.4 (-0.12-4.06)	15.7 (-1.59-45.16)	1.59 (-0.16-4.59)	0.51 (0.47-0.55)	18.09 (-1.6-52.77)	1.4 (-0.12-4.06)	15.7 (-1.59-45.16)	1.59 (-0.16-4.59)	0.51 (0.47-0.55)
Germany	370.44 (-28.54-1032.23)	1.74 (-0.13-4.86)	495.94 (-49.69-1437.73)	2.35 (-0.24-6.84)	0.94 (0.87-1.01)	370.44 (-28.54-1032.23)	1.74 (-0.13-4.86)	495.94 (-49.69-1437.73)	2.35 (-0.24-6.84)	0.94 (0.87-1.01)
Ghana	20.31 (-1.66-62.54)	0.8 (-0.07-2.46)	110.5 (-9.41-314.63)	1.46 (-0.12-4.14)	1.94 (1.88-2)	20.31 (-1.66-62.54)	0.8 (-0.07-2.46)	110.5 (-9.41-314.63)	1.46 (-0.12-4.14)	1.94 (1.88-2)
Greece	41.17 (-3.37-117.09)	1.52 (-0.12-4.32)	67.47 (-6.23-190.79)	2.19 (-0.2-6.21)	1.68 (1.46-1.9)	41.17 (-3.37-117.09)	1.52 (-0.12-4.32)	67.47 (-6.23-190.79)	2.19 (-0.2-6.21)	1.68 (1.46-1.9)
Greenland	0.19 (-0.02-0.55)	1.54 (-0.13-4.45)	0.26 (-0.03-0.75)	2.1 (-0.23-6)	1.01 (0.95-1.07)	0.19 (-0.02-0.55)	1.54 (-0.13-4.45)	0.26 (-0.03-0.75)	2.1 (-0.23-6)	1.01 (0.95-1.07)
Grenada	0.15 (-0.01-0.42)	1.05 (-0.08-2.97)	0.39 (-0.04-1.08)	1.47 (-0.16-4.11)	1.15 (1.1-1.2)	0.15 (-0.01-0.42)	1.05 (-0.08-2.97)	0.39 (-0.04-1.08)	1.47 (-0.16-4.11)	1.15 (1.1-1.2)
Guam	0.41 (-0.04-1.16)	1.42 (-0.14-4.02)	0.7 (-0.07-1.91)	1.77 (-0.18-4.87)	0.77 (0.73-0.81)	0.41 (-0.04-1.16)	1.42 (-0.14-4.02)	0.7 (-0.07-1.91)	1.77 (-0.18-4.87)	0.77 (0.73-0.81)
Guatemala	13.42 (-0.96-40.08)	1 (-0.07-2.98)	48.04 (-4.79-132.61)	1.3 (-0.13-3.58)	0.89 (0.86-0.92)	13.42 (-0.96-40.08)	1 (-0.07-2.98)	48.04 (-4.79-132.61)	1.3 (-0.13-3.58)	0.89 (0.86-0.92)
Guinea	8.33 (-0.65-26.25)	0.76 (-0.06-2.39)	23.76 (-1.65-70.39)	0.98 (-0.07-2.91)	0.85 (0.77-0.94)	8.33 (-0.65-26.25)	0.76 (-0.06-2.39)	23.76 (-1.65-70.39)	0.98 (-0.07-2.91)	0.85 (0.77-0.94)
Guinea-Bissau	1.27 (-0.1-3.91)	0.76 (-0.06-2.36)	3.94 (-0.31-11.93)	1.01 (-0.08-3.06)	0.89 (0.86-0.93)	1.27 (-0.1-3.91)	0.76 (-0.06-2.36)	3.94 (-0.31-11.93)	1.01 (-0.08-3.06)	0.89 (0.86-0.93)
Guyana	1.42 (-0.1-4.26)	0.98 (-0.07-2.92)	2.49 (-0.25-7.12)	1.31 (-0.13-3.76)	1.02 (0.98-1.07)	1.42 (-0.1-4.26)	0.98 (-0.07-2.92)	2.49 (-0.25-7.12)	1.31 (-0.13-3.76)	1.02 (0.98-1.07)
Haiti	6.58 (-0.44-19.58)	0.56 (-0.04-1.66)	27.83 (-1.99-82.03)	0.87 (-0.06-2.56)	1.58 (1.52-1.64)	6.58 (-0.44-19.58)	0.56 (-0.04-1.66)	27.83 (-1.99-82.03)	0.87 (-0.06-2.56)	1.58 (1.52-1.64)
Honduras	5.79 (-0.49-17.07)	0.78 (-0.07-2.28)	26.29 (-1.95-74.85)	1.11 (-0.08-3.14)	1.13 (1.05-1.22)	5.79 (-0.49-17.07)	0.78 (-0.07-2.28)	26.29 (-1.95-74.85)	1.11 (-0.08-3.14)	1.13 (1.05-1.22)
Hungary	45.74 (-3.64-134.91)	1.52 (-0.12-4.49)	58.9 (-4.69-164.68)	1.91 (-0.15-5.35)	0.77 (0.73-0.81)	45.74 (-3.64-134.91)	1.52 (-0.12-4.49)	58.9 (-4.69-164.68)	1.91 (-0.15-5.35)	0.77 (0.73-0.81)
Iceland	1.39 (-0.11-3.99)	2.32 (-0.19-6.63)	2.6 (-0.25-7.69)	2.85 (-0.27-8.44)	0.58 (0.5-0.66)	1.39 (-0.11-3.99)	2.32 (-0.19-6.63)	2.6 (-0.25-7.69)	2.85 (-0.27-8.44)	0.58 (0.5-0.66)
India	972.31 (-66.43-2854.24)	0.59 (-0.04-1.73)	4307.28 (-344.12-12011.32)	1.2 (-0.1-3.35)	2.72 (2.54-2.91)	972.31 (-66.43-2854.24)	0.59 (-0.04-1.73)	4307.28 (-344.12-12011.32)	1.2 (-0.1-3.35)	2.72 (2.54-2.91)
Indonesia	173.94 (-11.88-517.78)	0.47 (-0.03-1.38)	714.62 (-50.08-2007.74)	0.88 (-0.06-2.47)	2.28 (2.15-2.4)	173.94 (-11.88-517.78)	0.47 (-0.03-1.38)	714.62 (-50.08-2007.74)	0.88 (-0.06-2.47)	2.28 (2.15-2.4)
Iran (Islamic Republic of)	74.9 (-5.99-209.92)	0.86 (-0.07-2.38)	385.65 (-37.19-1034.04)	1.41 (-0.14-3.79)	1.59 (1.53-1.66)	74.9 (-5.99-209.92)	0.86 (-0.07-2.38)	385.65 (-37.19-1034.04)	1.41 (-0.14-3.79)	1.59 (1.53-1.66)
Iraq	32.22 (-3.14-92.6)	1.15 (-0.11-3.28)	134.6 (-12.33-390.3)	1.43 (-0.13-4.16)	0.77 (0.72-0.82)	32.22 (-3.14-92.6)	1.15 (-0.11-3.28)	134.6 (-12.33-390.3)	1.43 (-0.13-4.16)	0.77 (0.72-0.82)
Ireland	14.84 (-1.32-44.72)	1.75 (-0.16-5.28)	37.56 (-3.82-106.47)	2.48 (-0.25-7.04)	1.11 (1.06-1.17)	14.84 (-1.32-44.72)	1.75 (-0.16-5.28)	37.56 (-3.82-106.47)	2.48 (-0.25-7.04)	1.11 (1.06-1.17)
Israel	17.83 (-1.43-52.97)	1.61 (-0.13-4.79)	53.38 (-4.86-153.95)	2.19 (-0.2-6.33)	0.91 (0.83-0.98)	17.83 (-1.43-52.97)	1.61 (-0.13-4.79)	53.38 (-4.86-153.95)	2.19 (-0.2-6.33)	0.91 (0.83-0.98)
Italy	220.11 (-17.58-647.12)	1.44 (-0.11-4.22)	357.11 (-28.28-1008.03)	2.02 (-0.16-5.69)	1.06 (1.02-1.11)	220.11 (-17.58-647.12)	1.44 (-0.11-4.22)	357.11 (-28.28-1008.03)	2.02 (-0.16-5.69)	1.06 (1.02-1.11)
Jamaica	5.05 (-0.38-14.9)	1.2 (-0.09-3.53)	11.91 (-1.29-32.85)	1.58 (-0.17-4.36)	1.01 (0.95-1.07)	5.05 (-0.38-14.9)	1.2 (-0.09-3.53)	11.91 (-1.29-32.85)	1.58 (-0.17-4.36)	1.01 (0.95-1.07)
Japan	295.3 (-21.06-847.56)	0.75 (-0.05-2.15)	343 (-23.69-1009.99)	0.96 (-0.07-2.82)	0.79 (0.68-0.91)	295.3 (-21.06-847.56)	0.75 (-0.05-2.15)	343 (-23.69-1009.99)	0.96 (-0.07-2.82)	0.79 (0.68-0.91)
Jordan	6.04 (-0.64-17.3)	1.14 (-0.12-3.26)	48.84 (-5.93-133.44)	1.76 (-0.21-4.79)	1.45 (1.39-1.51)	6.04 (-0.64-17.3)	1.14 (-0.12-3.26)	48.84 (-5.93-133.44)	1.76 (-0.21-4.79)	1.45 (1.39-1.51)
Kazakhstan	46.67 (-3.88-129.47)	1.38 (-0.12-3.8)	96.31 (-9.08-278.99)	1.81 (-0.17-5.25)	0.88 (0.86-0.9)	46.67 (-3.88-129.47)	1.38 (-0.12-3.8)	96.31 (-9.08-278.99)	1.81 (-0.17-5.25)	0.88 (0.86-0.9)
Kenya	27.74 (-2.01-82.53)	0.87 (-0.06-2.58)	130.84 (-11.24-366.65)	1.32 (-0.11-3.68)	1.37 (1.34-1.41)	27.74 (-2.01-82.53)	0.87 (-0.06-2.58)	130.84 (-11.24-366.65)	1.32 (-0.11-3.68)	1.37 (1.34-1.41)
Kiribati	0.19 (-0.02-0.56)	1.36 (-0.12-3.9)	0.47 (-0.06-1.31)	1.66 (-0.22-4.56)	0.57 (0.45-0.7)	0.19 (-0.02-0.56)	1.36 (-0.12-3.9)	0.47 (-0.06-1.31)	1.66 (-0.22-4.56)	0.57 (0.45-0.7)
Kuwait	4.06 (-0.41-11.61)	1.33 (-0.14-3.77)	36.67 (-3.82-101.23)	2.02 (-0.21-5.57)	1.48 (1.42-1.53)	4.06 (-0.41-11.61)	1.33 (-0.14-3.77)	36.67 (-3.82-101.23)	2.02 (-0.21-5.57)	1.48 (1.42-1.53)
Kyrgyzstan	8.56 (-0.78-24.84)	1.21 (-0.11-3.49)	25.32 (-2.65-72.58)	1.56 (-0.16-4.46)	0.78 (0.76-0.81)	8.56 (-0.78-24.84)	1.21 (-0.11-3.49)	25.32 (-2.65-72.58)	1.56 (-0.16-4.46)	0.78 (0.76-0.81)
Lao People's Democratic Republic	2.61 (-0.19-8.07)	0.36 (-0.03-1.1)	11.21 (-0.73-34.77)	0.64 (-0.04-1.98)	2.22 (2.09-2.35)	2.61 (-0.19-8.07)	0.36 (-0.03-1.1)	11.21 (-0.73-34.77)	0.64 (-0.04-1.98)	2.22 (2.09-2.35)
Latvia	10.23 (-0.82-29.12)	1.39 (-0.11-3.96)	9.14 (-0.9-27.28)	1.73 (-0.17-5.17)	0.75 (0.71-0.78)	10.23 (-0.82-29.12)	1.39 (-0.11-3.96)	9.14 (-0.9-27.28)	1.73 (-0.17-5.17)	0.75 (0.71-0.78)
Lebanon	6.26 (-0.61-17.58)	0.96 (-0.09-2.71)	23.99 (-1.96-68.91)	1.49 (-0.12-4.27)	1.32 (1.16-1.47)	6.26 (-0.61-17.58)	0.96 (-0.09-2.71)	23.99 (-1.96-68.91)	1.49 (-0.12-4.27)	1.32 (1.16-1.47)
Lesotho	3.5 (-0.27-10.49)	1.11 (-0.09-3.32)	5.85 (-0.59-16.08)	1.5 (-0.15-4.09)	0.97 (0.93-1.01)	3.5 (-0.27-10.49)	1.11 (-0.09-3.32)	5.85 (-0.59-16.08)	1.5 (-0.15-4.09)	0.97 (0.93-1.01)
Liberia	3.87 (-0.29-11.79)	1.04 (-0.08-3.16)	15.95 (-1.38-46.99)	1.39 (-0.12-4.1)	1.15 (1.03-1.26)	3.87 (-0.29-11.79)	1.04 (-0.08-3.16)	15.95 (-1.38-46.99)	1.39 (-0.12-4.1)	1.15 (1.03-1.26)
Libya	6.17 (-0.48-18.24)	1.07 (-0.08-3.15)	37.23 (-3.84-105.95)	1.68 (-0.17-4.8)	1.49 (1.45-1.54)	6.17 (-0.48-18.24)	1.07 (-0.08-3.15)	37.23 (-3.84-105.95)	1.68 (-0.17-4.8)	1.49 (1.45-1.54)
Lithuania	11.45 (-0.94-35.09)	1.17 (-0.1-3.6)	11.83 (-1.03-34.56)	1.59 (-0.14-4.65)	1.03 (0.96-1.1)	11.45 (-0.94-35.09)	1.17 (-0.1-3.6)	11.83 (-1.03-34.56)	1.59 (-0.14-4.65)	1.03 (0.96-1.1)
Luxembourg	1.65 (-0.13-4.97)	1.57 (-0.12-4.74)	4.54 (-0.39-13.23)	2.31 (-0.2-6.75)	1.16 (1.11-1.22)	1.65 (-0.13-4.97)	1.57 (-0.12-4.74)	4.54 (-0.39-13.23)	2.31 (-0.2-6.75)	1.16 (1.11-1.22)
Madagascar	7.16 (-0.47-22.52)	0.39 (-0.03-1.22)	32.68 (-2.14-103.91)	0.6 (-0.04-1.89)	1.31 (1.21-1.41)	7.16 (-0.47-22.52)	0.39 (-0.03-1.22)	32.68 (-2.14-103.91)	0.6 (-0.04-1.89)	1.31 (1.21-1.41)
Malawi	9.78 (-0.68-29.97)	0.64 (-0.05-1.95)	35.45 (-2.75-105.91)	1.04 (-0.08-3.08)	1.61 (1.58-1.65)	9.78 (-0.68-29.97)	0.64 (-0.05-1.95)	35.45 (-2.75-105.91)	1.04 (-0.08-3.08)	1.61 (1.58-1.65)
Malaysia	29.04 (-2.11-87.77)	0.83 (-0.06-2.47)	101.57 (-9.19-294.25)	1.26 (-0.11-3.65)	1.41 (1.34-1.48)	29.04 (-2.11-87.77)	0.83 (-0.06-2.47)	101.57 (-9.19-294.25)	1.26 (-0.11-3.65)	1.41 (1.34-1.48)
Maldives	0.19 (-0.01-0.59)	0.62 (-0.04-1.92)	1.38 (-0.12-3.82)	1.13 (-0.1-3.12)	2.11 (2.03-2.19)	0.19 (-0.01-0.59)	0.62 (-0.04-1.92)	1.38 (-0.12-3.82)	1.13 (-0.1-3.12)	2.11 (2.03-2.19)
Mali	8.56 (-0.55-26.28)	0.59 (-0.04-1.81)	34.76 (-2.69-102.06)	0.95 (-0.07-2.75)	1.74 (1.6-1.88)	8.56 (-0.55-26.28)	0.59 (-0.04-1.81)	34.76 (-2.69-102.06)	0.95 (-0.07-2.75)	1.74 (1.6-1.88)
Malta	1.57 (-0.11-4.56)	1.44 (-0.1-4.18)	2.89 (-0.26-8.5)	2.37 (-0.21-6.99)	1.55 (1.38-1.72)	1.57 (-0.11-4.56)	1.44 (-0.1-4.18)	2.89 (-0.26-8.5)	2.37 (-0.21-6.99)	1.55 (1.38-1.72)
Marshall Islands	0.08 (-0.01-0.23)	1.26 (-0.13-3.47)	0.22 (-0.02-0.61)	1.56 (-0.16-4.3)	0.58 (0.52-0.64)	0.08 (-0.01-0.23)	1.26 (-0.13-3.47)	0.22 (-0.02-0.61)	1.56 (-0.16-4.3)	0.58 (0.52-0.64)
Mauritania	4.21 (-0.34-12.92)	1.25 (-0.1-3.8)	13.7 (-1.3-39.84)	1.69 (-0.16-4.89)	0.95 (0.92-0.98)	4.21 (-0.34-12.92)	1.25 (-0.1-3.8)	13.7 (-1.3-39.84)	1.69 (-0.16-4.89)	0.95 (0.92-0.98)
Mauritius	2.02 (-0.12-6.16)	0.81 (-0.05-2.44)	4.42 (-0.4-12.71)	1.22 (-0.11-3.52)	1.38 (1.33-1.44)	2.02 (-0.12-6.16)	0.81 (-0.05-2.44)	4.42 (-0.4-12.71)	1.22 (-0.11-3.52)	1.38 (1.33-1.44)
Mexico	211.79 (-20.33-584.33)	1.33 (-0.13-3.67)	617.6 (-59.82-1654.34)	1.67 (-0.16-4.48)	0.61 (0.54-0.68)	211.79 (-20.33-584.33)	1.33 (-0.13-3.67)	617.6 (-59.82-1654.34)	1.67 (-0.16-4.48)	0.61 (0.54-0.68)
Micronesia (Federated States of)	0.23 (-0.02-0.68)	1.45 (-0.13-4.2)	0.41 (-0.04-1.13)	1.76 (-0.18-4.8)	0.52 (0.39-0.65)	0.23 (-0.02-0.68)	1.45 (-0.13-4.2)	0.41 (-0.04-1.13)	1.76 (-0.18-4.8)	0.52 (0.39-0.65)
Monaco	0.19 (-0.02-0.54)	2.01 (-0.18-5.76)	0.26 (-0.03-0.73)	2.65 (-0.28-7.45)	0.85 (0.8-0.9)	0.19 (-0.02-0.54)	2.01 (-0.18-5.76)	0.26 (-0.03-0.73)	2.65 (-0.28-7.45)	0.85 (0.8-0.9)
Mongolia	3.61 (-0.28-10.43)	1.09 (-0.09-3.15)	13.07 (-1.26-37.55)	1.4 (-0.14-4.03)	0.9 (0.86-0.95)	3.61 (-0.28-10.43)	1.09 (-0.09-3.15)	13.07 (-1.26-37.55)	1.4 (-0.14-4.03)	0.9 (0.86-0.95)
Montenegro	2.01 (-0.17-6.2)	1.34 (-0.11-4.12)	3.17 (-0.29-8.61)	1.77 (-0.16-4.85)	1.05 (1.02-1.09)	2.01 (-0.17-6.2)	1.34 (-0.11-4.12)	3.17 (-0.29-8.61)	1.77 (-0.16-4.85)	1.05 (1.02-1.09)
Morocco	41.4 (-3.15-126.27)	0.87 (-0.07-2.64)	132.26 (-15.42-368.38)	1.32 (-0.15-3.67)	1.37 (1.34-1.41)	41.4 (-3.15-126.27)	0.87 (-0.07-2.64)	132.26 (-15.42-368.38)	1.32 (-0.15-3.67)	1.37 (1.34-1.41)
Mozambique	13.76 (-0.81-47.12)	0.56 (-0.03-1.92)	48.67 (-3.4-146.79)	0.92 (-0.07-2.78)	1.77 (1.69-1.84)	13.76 (-0.81-47.12)	0.56 (-0.03-1.92)	48.67 (-3.4-146.79)	0.92 (-0.07-2.78)	1.77 (1.69-1.84)
Myanmar	37.03 (-2.15-114.45)	0.48 (-0.03-1.48)	105.04 (-7.38-314.57)	0.69 (-0.05-2.07)	1.22 (1.17-1.28)	37.03 (-2.15-114.45)	0.48 (-0.03-1.48)	105.04 (-7.38-314.57)	0.69 (-0.05-2.07)	1.22 (1.17-1.28)
Namibia	2.15 (-0.14-6.51)	0.93 (-0.06-2.81)	7.56 (-0.62-21.4)	1.35 (-0.11-3.8)	1.19 (1.12-1.26)	2.15 (-0.14-6.51)	0.93 (-0.06-2.81)	7.56 (-0.62-21.4)	1.35 (-0.11-3.8)	1.19 (1.12-1.26)
Nauru	0.03 (0-0.09)	1.64 (-0.17-4.61)	0.05 (-0.01-0.13)	1.91 (-0.23-5.2)	0.41 (0.35-0.47)	0.03 (0-0.09)	1.64 (-0.17-4.61)	0.05 (-0.01-0.13)	1.91 (-0.23-5.2)	0.41 (0.35-0.47)
Nepal	21.32 (-1.53-67.59)	0.6 (-0.04-1.91)	108.83 (-7.75-330.96)	1.38 (-0.1-4.19)	3.07 (2.88-3.25)	21.32 (-1.53-67.59)	0.6 (-0.04-1.91)	108.83 (-7.75-330.96)	1.38 (-0.1-4.19)	3.07 (2.88-3.25)
Netherlands	68.59 (-6.37-200.51)	1.65 (-0.15-4.82)	105.33 (-9.3-302.8)	2.38 (-0.21-6.85)	1.18 (1.14-1.23)	68.59 (-6.37-200.51)	1.65 (-0.15-4.82)	105.33 (-9.3-302.8)	2.38 (-0.21-6.85)	1.18 (1.14-1.23)
New Zealand	15.93 (-1.3-46.97)	1.79 (-0.15-5.29)	35.05 (-3.37-100.52)	2.59 (-0.25-7.42)	1.26 (1.21-1.31)	15.93 (-1.3-46.97)	1.79 (-0.15-5.29)	35.05 (-3.37-100.52)	2.59 (-0.25-7.42)	1.26 (1.21-1.31)
Nicaragua	6.34 (-0.52-18.42)	1.05 (-0.09-3.06)	23.39 (-2.32-66.7)	1.38 (-0.14-3.94)	0.88 (0.82-0.93)	6.34 (-0.52-18.42)	1.05 (-0.09-3.06)	23.39 (-2.32-66.7)	1.38 (-0.14-3.94)	0.88 (0.82-0.93)
Niger	8.84 (-0.53-28.06)	0.72 (-0.04-2.28)	28.92 (-2.27-87.75)	0.84 (-0.07-2.55)	0.51 (0.48-0.54)	8.84 (-0.53-28.06)	0.72 (-0.04-2.28)	28.92 (-2.27-87.75)	0.84 (-0.07-2.55)	0.51 (0.48-0.54)
Nigeria	107.72 (-8.15-310.6)	0.82 (-0.06-2.34)	503.57 (-44.86-1406.2)	1.21 (-0.11-3.37)	1.1 (0.99-1.22)	107.72 (-8.15-310.6)	0.82 (-0.06-2.34)	503.57 (-44.86-1406.2)	1.21 (-0.11-3.37)	1.1 (0.99-1.22)
Niue	0.01 (0-0.02)	1.51 (-0.13-4.34)	0.01 (0-0.02)	2.01 (-0.23-5.45)	0.92 (0.82-1.01)	0.01 (0-0.02)	1.51 (-0.13-4.34)	0.01 (0-0.02)	2.01 (-0.23-5.45)	0.92 (0.82-1.01)
North Macedonia	6.39 (-0.51-18.77)	1.26 (-0.1-3.71)	11.56 (-0.98-31.55)	1.73 (-0.15-4.73)	1.06 (1.02-1.1)	6.39 (-0.51-18.77)	1.26 (-0.1-3.71)	11.56 (-0.98-31.55)	1.73 (-0.15-4.73)	1.06 (1.02-1.1)
Northern Mariana Islands	0.18 (-0.02-0.5)	1.69 (-0.19-4.81)	0.3 (-0.04-0.81)	2.03 (-0.23-5.47)	0.43 (0.31-0.54)	0.18 (-0.02-0.5)	1.69 (-0.19-4.81)	0.3 (-0.04-0.81)	2.03 (-0.23-5.47)	0.43 (0.31-0.54)
Norway	18.77 (-1.5-53.76)	1.66 (-0.13-4.76)	34.65 (-3.15-97.48)	2.38 (-0.21-6.68)	1.21 (1.17-1.24)	18.77 (-1.5-53.76)	1.66 (-0.13-4.76)	34.65 (-3.15-97.48)	2.38 (-0.21-6.68)	1.21 (1.17-1.24)
Oman	2.29 (-0.17-6.97)	0.91 (-0.07-2.76)	18.05 (-2.03-52.31)	1.78 (-0.21-5.15)	2.41 (2.35-2.48)	2.29 (-0.17-6.97)	0.91 (-0.07-2.76)	18.05 (-2.03-52.31)	1.78 (-0.21-5.15)	2.41 (2.35-2.48)
Pakistan	186.74 (-14.39-530.64)	1.01 (-0.08-2.87)	983.02 (-82.9-2821.71)	1.91 (-0.16-5.48)	2.46 (2.32-2.59)	186.74 (-14.39-530.64)	1.01 (-0.08-2.87)	983.02 (-82.9-2821.71)	1.91 (-0.16-5.48)	2.46 (2.32-2.59)
Palau	0.05 (0-0.14)	1.5 (-0.14-4.03)	0.1 (-0.01-0.28)	1.96 (-0.23-5.49)	0.73 (0.61-0.86)	0.05 (0-0.14)	1.5 (-0.14-4.03)	0.1 (-0.01-0.28)	1.96 (-0.23-5.49)	0.73 (0.61-0.86)
Palestine	3.12 (-0.35-9.11)	1.07 (-0.12-3.11)	15.2 (-1.7-42.48)	1.47 (-0.17-4.1)	0.93 (0.86-0.99)	3.12 (-0.35-9.11)	1.07 (-0.12-3.11)	15.2 (-1.7-42.48)	1.47 (-0.17-4.1)	0.93 (0.86-0.99)
Panama	3.34 (-0.25-10.57)	0.7 (-0.05-2.21)	13.38 (-0.94-40)	1.24 (-0.09-3.72)	1.81 (1.7-1.91)	3.34 (-0.25-10.57)	0.7 (-0.05-2.21)	13.38 (-0.94-40)	1.24 (-0.09-3.72)	1.81 (1.7-1.91)
Papua New Guinea	4.97 (-0.42-15.2)	0.7 (-0.06-2.12)	20.81 (-1.48-63.59)	0.9 (-0.06-2.76)	0.81 (0.74-0.88)	4.97 (-0.42-15.2)	0.7 (-0.06-2.12)	20.81 (-1.48-63.59)	0.9 (-0.06-2.76)	0.81 (0.74-0.88)
Paraguay	7.37 (-0.64-22.45)	1.02 (-0.09-3.1)	23.44 (-2.01-65.16)	1.35 (-0.12-3.75)	0.96 (0.92-0.99)	7.37 (-0.64-22.45)	1.02 (-0.09-3.1)	23.44 (-2.01-65.16)	1.35 (-0.12-3.75)	0.96 (0.92-0.99)
Peru	40.92 (-3.17-124.06)	1 (-0.08-3.02)	139.45 (-13.05-398.72)	1.43 (-0.13-4.1)	1.23 (1.2-1.26)	40.92 (-3.17-124.06)	1 (-0.08-3.02)	139.45 (-13.05-398.72)	1.43 (-0.13-4.1)	1.23 (1.2-1.26)
Philippines	68.18 (-4.73-202.79)	0.59 (-0.04-1.74)	234.72 (-16.7-663.72)	0.88 (-0.06-2.49)	1.27 (1.21-1.33)	68.18 (-4.73-202.79)	0.59 (-0.04-1.74)	234.72 (-16.7-663.72)	0.88 (-0.06-2.49)	1.27 (1.21-1.33)
Poland	117.13 (-9.01-342.57)	1.2 (-0.09-3.53)	210.78 (-17.67-596.36)	1.78 (-0.15-5.05)	1.33 (1.28-1.38)	117.13 (-9.01-342.57)	1.2 (-0.09-3.53)	210.78 (-17.67-596.36)	1.78 (-0.15-5.05)	1.33 (1.28-1.38)
Portugal	40.52 (-3.8-117.4)	1.54 (-0.14-4.47)	76.12 (-6.65-219.88)	2.28 (-0.2-6.58)	1.02 (0.91-1.14)	40.52 (-3.8-117.4)	1.54 (-0.14-4.47)	76.12 (-6.65-219.88)	2.28 (-0.2-6.58)	1.02 (0.91-1.14)
Puerto Rico	14.59 (-1.41-42.55)	1.53 (-0.15-4.46)	17.51 (-1.63-48.83)	1.93 (-0.18-5.43)	0.87 (0.82-0.93)	14.59 (-1.41-42.55)	1.53 (-0.15-4.46)	17.51 (-1.63-48.83)	1.93 (-0.18-5.43)	0.87 (0.82-0.93)
Qatar	0.9 (-0.08-2.59)	1.35 (-0.13-3.81)	12.91 (-1.8-35.13)	2.11 (-0.29-5.77)	1.42 (1.37-1.48)	0.9 (-0.08-2.59)	1.35 (-0.13-3.81)	12.91 (-1.8-35.13)	2.11 (-0.29-5.77)	1.42 (1.37-1.48)
Republic of Korea	66.83 (-5-204.78)	0.63 (-0.05-1.94)	162.2 (-13.19-464.77)	1.01 (-0.08-2.9)	1.57 (1.54-1.6)	66.83 (-5-204.78)	0.63 (-0.05-1.94)	162.2 (-13.19-464.77)	1.01 (-0.08-2.9)	1.57 (1.54-1.6)
Republic of Moldova	13.08 (-1.32-38.31)	1.19 (-0.12-3.47)	20.17 (-2.11-57.77)	1.74 (-0.18-4.98)	1.36 (1.32-1.41)	13.08 (-1.32-38.31)	1.19 (-0.12-3.47)	20.17 (-2.11-57.77)	1.74 (-0.18-4.98)	1.36 (1.32-1.41)
Romania	70.03 (-6.09-208.99)	1.22 (-0.11-3.63)	97.75 (-8.29-272.94)	1.73 (-0.15-4.84)	1.18 (1.11-1.24)	70.03 (-6.09-208.99)	1.22 (-0.11-3.63)	97.75 (-8.29-272.94)	1.73 (-0.15-4.84)	1.18 (1.11-1.24)
Russian Federation	490.57 (-43.02-1363.42)	1.33 (-0.12-3.69)	826.58 (-80.69-2252.2)	1.82 (-0.18-4.96)	1.08 (1.06-1.11)	490.57 (-43.02-1363.42)	1.33 (-0.12-3.69)	826.58 (-80.69-2252.2)	1.82 (-0.18-4.96)	1.08 (1.06-1.11)
Rwanda	6.18 (-0.43-19.33)	0.56 (-0.04-1.75)	25.04 (-1.98-75.79)	0.88 (-0.07-2.66)	1.42 (1.31-1.53)	6.18 (-0.43-19.33)	0.56 (-0.04-1.75)	25.04 (-1.98-75.79)	0.88 (-0.07-2.66)	1.42 (1.31-1.53)
Saint Kitts and Nevis	0.08 (-0.01-0.24)	1.18 (-0.09-3.48)	0.29 (-0.03-0.83)	1.62 (-0.15-4.69)	1.07 (1.03-1.12)	0.08 (-0.01-0.24)	1.18 (-0.09-3.48)	0.29 (-0.03-0.83)	1.62 (-0.15-4.69)	1.07 (1.03-1.12)
Saint Lucia	0.28 (-0.02-0.84)	1.18 (-0.1-3.49)	0.85 (-0.09-2.35)	1.57 (-0.16-4.37)	0.99 (0.95-1.03)	0.28 (-0.02-0.84)	1.18 (-0.1-3.49)	0.85 (-0.09-2.35)	1.57 (-0.16-4.37)	0.99 (0.95-1.03)
Saint Vincent and the Grenadines	0.15 (-0.01-0.46)	0.87 (-0.06-2.6)	0.41 (-0.04-1.17)	1.34 (-0.12-3.84)	1.45 (1.4-1.51)	0.15 (-0.01-0.46)	0.87 (-0.06-2.6)	0.41 (-0.04-1.17)	1.34 (-0.12-3.84)	1.45 (1.4-1.51)
Samoa	0.43 (-0.05-1.21)	1.68 (-0.18-4.68)	0.79 (-0.09-2.16)	1.92 (-0.22-5.23)	0.34 (0.25-0.42)	0.43 (-0.05-1.21)	1.68 (-0.18-4.68)	0.79 (-0.09-2.16)	1.92 (-0.22-5.23)	0.34 (0.25-0.42)
San Marino	0.11 (-0.01-0.35)	1.86 (-0.16-5.6)	0.25 (-0.02-0.71)	2.48 (-0.23-6.91)	0.92 (0.85-0.98)	0.11 (-0.01-0.35)	1.86 (-0.16-5.6)	0.25 (-0.02-0.71)	2.48 (-0.23-6.91)	0.92 (0.85-0.98)
Sao Tome and Principe	0.18 (-0.01-0.54)	1.07 (-0.08-3.17)	0.71 (-0.07-2.03)	1.52 (-0.14-4.35)	1.15 (1.11-1.19)	0.18 (-0.01-0.54)	1.07 (-0.08-3.17)	0.71 (-0.07-2.03)	1.52 (-0.14-4.35)	1.15 (1.11-1.19)
Saudi Arabia	24.71 (-2.25-71.55)	1.09 (-0.1-3.15)	212.32 (-22.41-586.22)	1.92 (-0.2-5.27)	1.87 (1.82-1.92)	24.71 (-2.25-71.55)	1.09 (-0.1-3.15)	212.32 (-22.41-586.22)	1.92 (-0.2-5.27)	1.87 (1.82-1.92)
Senegal	12.32 (-1.01-36.5)	1.04 (-0.09-3.09)	37.15 (-2.92-109.62)	1.24 (-0.1-3.65)	0.51 (0.46-0.55)	12.32 (-1.01-36.5)	1.04 (-0.09-3.09)	37.15 (-2.92-109.62)	1.24 (-0.1-3.65)	0.51 (0.46-0.55)
Serbia	32.45 (-2.47-93.21)	1.29 (-0.1-3.71)	48.16 (-4.2-140.28)	1.89 (-0.16-5.5)	1.29 (1.25-1.33)	32.45 (-2.47-93.21)	1.29 (-0.1-3.71)	48.16 (-4.2-140.28)	1.89 (-0.16-5.5)	1.29 (1.25-1.33)
Seychelles	0.14 (-0.01-0.43)	1.13 (-0.11-3.33)	0.43 (-0.05-1.23)	1.5 (-0.16-4.34)	0.85 (0.81-0.88)	0.14 (-0.01-0.43)	1.13 (-0.11-3.33)	0.43 (-0.05-1.23)	1.5 (-0.16-4.34)	0.85 (0.81-0.88)
Sierra Leone	4.78 (-0.28-15.36)	0.7 (-0.04-2.22)	15.93 (-1.3-47.5)	0.99 (-0.08-2.95)	1.11 (0.98-1.25)	4.78 (-0.28-15.36)	0.7 (-0.04-2.22)	15.93 (-1.3-47.5)	0.99 (-0.08-2.95)	1.11 (0.98-1.25)
Singapore	6.04 (-0.43-18.43)	0.7 (-0.05-2.12)	28.77 (-2.21-87.98)	1.46 (-0.11-4.47)	2.33 (2.19-2.47)	6.04 (-0.43-18.43)	0.7 (-0.05-2.12)	28.77 (-2.21-87.98)	1.46 (-0.11-4.47)	2.33 (2.19-2.47)
Slovakia	17.98 (-1.53-53.51)	1.31 (-0.11-3.9)	29.62 (-2.91-87.31)	1.71 (-0.17-5.06)	0.8 (0.77-0.84)	17.98 (-1.53-53.51)	1.31 (-0.11-3.9)	29.62 (-2.91-87.31)	1.71 (-0.17-5.06)	0.8 (0.77-0.84)
Slovenia	7.11 (-0.56-21.04)	1.35 (-0.11-3.99)	10.52 (-0.89-30.16)	1.79 (-0.15-5.16)	1.01 (0.94-1.08)	7.11 (-0.56-21.04)	1.35 (-0.11-3.99)	10.52 (-0.89-30.16)	1.79 (-0.15-5.16)	1.01 (0.94-1.08)
Solomon Islands	0.52 (-0.04-1.55)	1.03 (-0.09-3.08)	1.91 (-0.19-5.39)	1.26 (-0.13-3.56)	0.55 (0.46-0.65)	0.52 (-0.04-1.55)	1.03 (-0.09-3.08)	1.91 (-0.19-5.39)	1.26 (-0.13-3.56)	0.55 (0.46-0.65)
Somalia	10.23 (-0.69-31.47)	0.76 (-0.05-2.33)	35.79 (-2.74-105.92)	1 (-0.08-2.96)	1 (0.95-1.04)	10.23 (-0.69-31.47)	0.76 (-0.05-2.33)	35.79 (-2.74-105.92)	1 (-0.08-2.96)	1 (0.95-1.04)
South Africa	103.06 (-8.52-278.52)	1.43 (-0.12-3.86)	271.15 (-30.39-736.52)	1.76 (-0.2-4.76)	0.7 (0.67-0.73)	103.06 (-8.52-278.52)	1.43 (-0.12-3.86)	271.15 (-30.39-736.52)	1.76 (-0.2-4.76)	0.7 (0.67-0.73)
South Sudan	3.99 (-0.3-12.61)	0.48 (-0.04-1.51)	11.18 (-0.77-34.16)	0.59 (-0.04-1.79)	0.68 (0.65-0.71)	3.99 (-0.3-12.61)	0.48 (-0.04-1.51)	11.18 (-0.77-34.16)	0.59 (-0.04-1.79)	0.68 (0.65-0.71)
Spain	176.72 (-14.81-531.81)	1.84 (-0.15-5.53)	374.97 (-37.83-1061.96)	2.55 (-0.26-7.24)	0.93 (0.82-1.04)	176.72 (-14.81-531.81)	1.84 (-0.15-5.53)	374.97 (-37.83-1061.96)	2.55 (-0.26-7.24)	0.93 (0.82-1.04)
Sri Lanka	20.96 (-1.34-61.87)	0.53 (-0.03-1.56)	50.86 (-3.47-155.28)	0.82 (-0.06-2.5)	1.37 (1.29-1.45)	20.96 (-1.34-61.87)	0.53 (-0.03-1.56)	50.86 (-3.47-155.28)	0.82 (-0.06-2.5)	1.37 (1.29-1.45)
Sudan	26.18 (-2.14-76.18)	0.77 (-0.06-2.23)	118.89 (-11.15-338.92)	1.31 (-0.13-3.74)	1.77 (1.69-1.84)	26.18 (-2.14-76.18)	0.77 (-0.06-2.23)	118.89 (-11.15-338.92)	1.31 (-0.13-3.74)	1.77 (1.69-1.84)
Suriname	0.69 (-0.06-2.06)	0.88 (-0.07-2.62)	2.05 (-0.17-6.02)	1.32 (-0.11-3.88)	1.38 (1.34-1.42)	0.69 (-0.06-2.06)	0.88 (-0.07-2.62)	2.05 (-0.17-6.02)	1.32 (-0.11-3.88)	1.38 (1.34-1.42)
Sweden	33.89 (-3-100.11)	1.38 (-0.12-4.06)	58.7 (-4.84-168.18)	2.22 (-0.18-6.37)	1.66 (1.5-1.81)	33.89 (-3-100.11)	1.38 (-0.12-4.06)	58.7 (-4.84-168.18)	2.22 (-0.18-6.37)	1.66 (1.5-1.81)
Switzerland	28.53 (-2.02-85.3)	1.42 (-0.1-4.24)	47.65 (-4.31-140.99)	1.9 (-0.17-5.64)	1 (0.96-1.03)	28.53 (-2.02-85.3)	1.42 (-0.1-4.24)	47.65 (-4.31-140.99)	1.9 (-0.17-5.64)	1 (0.96-1.03)
Syrian Arab Republic	17.8 (-1.61-50.71)	0.98 (-0.09-2.79)	62.31 (-7.26-174.08)	1.52 (-0.18-4.27)	1.37 (1.32-1.43)	17.8 (-1.61-50.71)	0.98 (-0.09-2.79)	62.31 (-7.26-174.08)	1.52 (-0.18-4.27)	1.37 (1.32-1.43)
Taiwan (Province of China)	22.82 (-1.73-69.63)	0.49 (-0.04-1.48)	74.45 (-5.92-215.93)	0.98 (-0.08-2.86)	2.42 (2.34-2.5)	22.82 (-1.73-69.63)	0.49 (-0.04-1.48)	74.45 (-5.92-215.93)	0.98 (-0.08-2.86)	2.42 (2.34-2.5)
Tajikistan	7.41 (-0.7-21.45)	1.05 (-0.1-3.01)	27.88 (-2.37-79.26)	1.27 (-0.11-3.57)	0.64 (0.62-0.67)	7.41 (-0.7-21.45)	1.05 (-0.1-3.01)	27.88 (-2.37-79.26)	1.27 (-0.11-3.57)	0.64 (0.62-0.67)
Thailand	77.06 (-4.99-234.72)	0.58 (-0.04-1.77)	240.21 (-20.65-675.35)	1.11 (-0.09-3.15)	2.19 (2.11-2.27)	77.06 (-4.99-234.72)	0.58 (-0.04-1.77)	240.21 (-20.65-675.35)	1.11 (-0.09-3.15)	2.19 (2.11-2.27)
Timor-Leste	0.38 (-0.02-1.18)	0.26 (-0.02-0.81)	1.14 (-0.08-3.63)	0.45 (-0.03-1.43)	1.85 (1.8-1.91)	0.38 (-0.02-1.18)	0.26 (-0.02-0.81)	1.14 (-0.08-3.63)	0.45 (-0.03-1.43)	1.85 (1.8-1.91)
Togo	4.82 (-0.32-14.69)	0.81 (-0.05-2.46)	21.71 (-1.36-66.49)	1.17 (-0.07-3.59)	1.2 (1.16-1.25)	4.82 (-0.32-14.69)	0.81 (-0.05-2.46)	21.71 (-1.36-66.49)	1.17 (-0.07-3.59)	1.2 (1.16-1.25)
Tokelau	0 (0-0.01)	1.29 (-0.13-3.67)	0.01 (0-0.02)	1.8 (-0.21-5.14)	1.03 (0.96-1.11)	0 (0-0.01)	1.29 (-0.13-3.67)	0.01 (0-0.02)	1.8 (-0.21-5.14)	1.03 (0.96-1.11)
Tonga	0.29 (-0.03-0.81)	1.69 (-0.19-4.74)	0.47 (-0.06-1.25)	2.04 (-0.26-5.46)	0.39 (0.23-0.55)	0.29 (-0.03-0.81)	1.69 (-0.19-4.74)	0.47 (-0.06-1.25)	2.04 (-0.26-5.46)	0.39 (0.23-0.55)
Trinidad and Tobago	3.26 (-0.28-9.37)	1.25 (-0.11-3.59)	6.42 (-0.64-18.27)	1.61 (-0.16-4.58)	0.92 (0.87-0.97)	3.26 (-0.28-9.37)	1.25 (-0.11-3.59)	6.42 (-0.64-18.27)	1.61 (-0.16-4.58)	0.92 (0.87-0.97)
Tunisia	12.83 (-1.16-37.68)	0.84 (-0.08-2.47)	49.36 (-5.14-137.73)	1.37 (-0.14-3.83)	1.6 (1.57-1.63)	12.83 (-1.16-37.68)	0.84 (-0.08-2.47)	49.36 (-5.14-137.73)	1.37 (-0.14-3.83)	1.6 (1.57-1.63)
Turkey	117.52 (-10.7-330.99)	1.05 (-0.1-2.95)	387.5 (-40.5-1068.89)	1.58 (-0.16-4.37)	1.25 (1.2-1.29)	117.52 (-10.7-330.99)	1.05 (-0.1-2.95)	387.5 (-40.5-1068.89)	1.58 (-0.16-4.37)	1.25 (1.2-1.29)
Turkmenistan	6.52 (-0.51-19.61)	1.16 (-0.09-3.49)	19.1 (-1.68-55.61)	1.56 (-0.14-4.53)	0.97 (0.95-0.98)	6.52 (-0.51-19.61)	1.16 (-0.09-3.49)	19.1 (-1.68-55.61)	1.56 (-0.14-4.53)	0.97 (0.95-0.98)
Tuvalu	0.03 (0-0.08)	1.18 (-0.08-3.47)	0.04 (0-0.12)	1.66 (-0.18-4.51)	1.02 (0.95-1.09)	0.03 (0-0.08)	1.18 (-0.08-3.47)	0.04 (0-0.12)	1.66 (-0.18-4.51)	1.02 (0.95-1.09)
Uganda	14.5 (-1.11-47.63)	0.61 (-0.05-1.99)	68.95 (-6.29-205.27)	0.99 (-0.09-2.94)	1.8 (1.73-1.88)	14.5 (-1.11-47.63)	0.61 (-0.05-1.99)	68.95 (-6.29-205.27)	0.99 (-0.09-2.94)	1.8 (1.73-1.88)
Ukraine	184.53 (-14.04-530.55)	1.35 (-0.1-3.89)	229.13 (-22.38-659.61)	1.66 (-0.16-4.78)	0.74 (0.69-0.78)	184.53 (-14.04-530.55)	1.35 (-0.1-3.89)	229.13 (-22.38-659.61)	1.66 (-0.16-4.78)	0.74 (0.69-0.78)
United Arab Emirates	2.71 (-0.23-7.4)	1.11 (-0.1-2.98)	49.07 (-5.95-135.24)	1.97 (-0.24-5.4)	1.99 (1.94-2.05)	2.71 (-0.23-7.4)	1.11 (-0.1-2.98)	49.07 (-5.95-135.24)	1.97 (-0.24-5.4)	1.99 (1.94-2.05)
United Kingdom	303.27 (-26.15-859.18)	1.98 (-0.17-5.6)	512.49 (-48.92-1414.6)	2.81 (-0.27-7.74)	1.12 (1.04-1.2)	303.27 (-26.15-859.18)	1.98 (-0.17-5.6)	512.49 (-48.92-1414.6)	2.81 (-0.27-7.74)	1.12 (1.04-1.2)
United Republic of Tanzania	30.09 (-1.99-87.43)	0.77 (-0.05-2.23)	139.76 (-9.92-413)	1.24 (-0.09-3.66)	1.69 (1.61-1.77)	30.09 (-1.99-87.43)	0.77 (-0.05-2.23)	139.76 (-9.92-413)	1.24 (-0.09-3.66)	1.69 (1.61-1.77)
United States of America	1860.98 (-164.23-5181.46)	2.69 (-0.24-7.47)	3065.7 (-331.76-8161.53)	3.57 (-0.39-9.5)	1.17 (1.04-1.3)	1860.98 (-164.23-5181.46)	2.69 (-0.24-7.47)	3065.7 (-331.76-8161.53)	3.57 (-0.39-9.5)	1.17 (1.04-1.3)
United States Virgin Islands	0.51 (-0.05-1.42)	1.58 (-0.14-4.42)	0.42 (-0.04-1.13)	1.91 (-0.19-5.2)	0.68 (0.64-0.72)	0.51 (-0.05-1.42)	1.58 (-0.14-4.42)	0.42 (-0.04-1.13)	1.91 (-0.19-5.2)	0.68 (0.64-0.72)
Uruguay	11.27 (-0.83-34.04)	1.48 (-0.11-4.48)	20.32 (-1.82-58.18)	2.15 (-0.19-6.18)	1.28 (1.19-1.36)	11.27 (-0.83-34.04)	1.48 (-0.11-4.48)	20.32 (-1.82-58.18)	2.15 (-0.19-6.18)	1.28 (1.19-1.36)
Uzbekistan	36.86 (-2.92-112.05)	1.19 (-0.1-3.62)	146.06 (-14.42-411.44)	1.6 (-0.16-4.52)	1.05 (1.02-1.08)	36.86 (-2.92-112.05)	1.19 (-0.1-3.62)	146.06 (-14.42-411.44)	1.6 (-0.16-4.52)	1.05 (1.02-1.08)
Vanuatu	0.25 (-0.02-0.72)	1 (-0.08-2.83)	0.85 (-0.09-2.41)	1.27 (-0.13-3.58)	0.74 (0.7-0.79)	0.25 (-0.02-0.72)	1 (-0.08-2.83)	0.85 (-0.09-2.41)	1.27 (-0.13-3.58)	0.74 (0.7-0.79)
Venezuela (Bolivarian Republic of)	41.47 (-3.89-116.16)	1.13 (-0.1-3.14)	114.57 (-12.5-319.88)	1.45 (-0.16-4.05)	0.84 (0.8-0.88)	41.47 (-3.89-116.16)	1.13 (-0.1-3.14)	114.57 (-12.5-319.88)	1.45 (-0.16-4.05)	0.84 (0.8-0.88)
Viet Nam	21.36 (-1.48-68.4)	0.19 (-0.01-0.6)	121.91 (-7.62-396.09)	0.42 (-0.03-1.37)	3.11 (2.92-3.31)	21.36 (-1.48-68.4)	0.19 (-0.01-0.6)	121.91 (-7.62-396.09)	0.42 (-0.03-1.37)	3.11 (2.92-3.31)
Yemen	10.55 (-0.69-31.89)	0.54 (-0.04-1.65)	55.48 (-3.47-162.98)	0.83 (-0.05-2.42)	1.45 (1.38-1.53)	10.55 (-0.69-31.89)	0.54 (-0.04-1.65)	55.48 (-3.47-162.98)	0.83 (-0.05-2.42)	1.45 (1.38-1.53)
Zambia	7.51 (-0.54-24.19)	0.65 (-0.05-2.09)	38.6 (-3.01-118.03)	1.12 (-0.09-3.41)	1.73 (1.68-1.78)	7.51 (-0.54-24.19)	0.65 (-0.05-2.09)	38.6 (-3.01-118.03)	1.12 (-0.09-3.41)	1.73 (1.68-1.78)
Zimbabwe	14.46 (-1.09-46.24)	0.94 (-0.07-3)	41.18 (-3.51-119.41)	1.28 (-0.11-3.7)	0.85 (0.76-0.94)	14.46 (-1.09-46.24)	0.94 (-0.07-3)	41.18 (-3.51-119.41)	1.28 (-0.11-3.7)	0.85 (0.76-0.94)
